# Supplementary material for: Bis(4-carboxylpyrazol-1-yl)acetic acid: a scorpionate ligand for complexes with improved water solubility
Source: Royal Society of Chemistry journal article supplement (doi:10.1039/d2dt00848c), 2022-01-01
Supplement: d2dt00848c1.pdf [file d2dt00848c1.pdf]

Supporting Information

For

# **Bis(4-carboxypyrazol-1-yl)acetic acid: A scorpionate ligand for complexes with improved water solubility**

Wintana Tzegai,<sup>[a]</sup> Michaela Reil,<sup>[a]</sup> and Nicolai Burzlaff\*<sup>[a]</sup>

<sup>[a]</sup>Inorganic Chemistry, Department of Chemistry and Pharmacy, Friedrich-Alexander-Universität Erlangen-Nürnberg (FAU), Egerlandstraße 1, 91058 Erlangen, Germany

## **Table of Contents**

- 1. Single Crystal X-ray Diffraction Experiments**
- 2. <sup>1</sup>H NMR and <sup>13</sup>C NMR spectra**
- 3. UV-vis spectra**
- 4. IR spectra**
- 5. MS data**
- 6. Elemental analyses**

## 1. Single Crystal X-ray Diffraction Experiments

**Table S1.** Methods and solvents used in the preparation of single crystals of ligand **2** and complexes **4 - 6**.

| Compound    | Technique               | Solution in      | Solvent for solvent diffusion | Temperature |
|-------------|-------------------------|------------------|-------------------------------|-------------|
| <b>2</b>    | liquid-liquid diffusion | tetrahydrofurane | <i>n</i> -pentane             | ambient     |
| <b>4</b>    | liquid-liquid diffusion | acetonitrile     | chloroform                    | ambient     |
| <b>5</b>    | liquid-liquid diffusion | acetone          | dichloromethane               | ambient     |
| <b>6a-1</b> | liquid-liquid diffusion | methanol         | diethylether                  | ambient     |
| <b>6a-2</b> | slow evaporation        | water            | -                             | 4°C         |

**Table S2.** Crystal data and refinement details of compounds **2** and **4-6**.

|                                                           | <b>2</b>                                                                                       | <b>4</b>                                                       | <b>5</b>                                                                               | <b>6a-1</b>                                                                           | <b>6a-2</b>                                                                          |
|-----------------------------------------------------------|------------------------------------------------------------------------------------------------|----------------------------------------------------------------|----------------------------------------------------------------------------------------|---------------------------------------------------------------------------------------|--------------------------------------------------------------------------------------|
| CCDC number                                               | 2130703                                                                                        | 2130704                                                        | 2130706                                                                                | 2130707                                                                               | 2130708                                                                              |
| empirical formula                                         | C <sub>10</sub> H <sub>8</sub> N <sub>4</sub> O <sub>6</sub> × C <sub>4</sub> H <sub>8</sub> O | C <sub>13</sub> H <sub>7</sub> MnN <sub>4</sub> O <sub>9</sub> | C <sub>13</sub> H <sub>7</sub> N <sub>4</sub> O <sub>9</sub> Re × 0.5 H <sub>2</sub> O | C <sub>12</sub> H <sub>7</sub> ClN <sub>4</sub> O <sub>8</sub> Ru × CH <sub>4</sub> O | C <sub>12</sub> H <sub>7</sub> ClN <sub>4</sub> O <sub>8</sub> Ru × H <sub>2</sub> O |
| formula mass [g mol <sup>-1</sup> ]                       | 352.31                                                                                         | 418.17                                                         | 558.43                                                                                 | 503.78                                                                                | 489.75                                                                               |
| crystal color/habit                                       | colourless/ block                                                                              | light yellow/ block                                            | colourless/ block                                                                      | metallic yellow/ block                                                                | yellow/ plate                                                                        |
| crystal system                                            | monoclinic                                                                                     | monoclinic                                                     | triclinic                                                                              | monoclinic                                                                            | monoclinic                                                                           |
| space group, Z                                            | <i>I</i> 2/ <i>a</i> , 8                                                                       | <i>P</i> 2 <sub>1</sub> / <i>n</i> , 4                         | <i>P</i> -1, 8                                                                         | <i>C</i> 2/ <i>c</i> , 8                                                              | <i>P</i> 2 <sub>1</sub> / <i>c</i> , 4                                               |
| <i>a</i> [Å]                                              | 15.8518(3)                                                                                     | 14.9306(5)                                                     | 14.3811(5)                                                                             | 33.2013(8)                                                                            | 12.5010(2)                                                                           |
| <i>b</i> [Å]                                              | 15.4697(4)                                                                                     | 5.6066(2)                                                      | 15.1010(5)                                                                             | 11.7943(3)                                                                            | 14.0811(2)                                                                           |
| <i>c</i> [Å]                                              | 13.9712(2)                                                                                     | 20.6630(8)                                                     | 17.2257(6)                                                                             | 10.7307(2)                                                                            | 9.18410(10)                                                                          |
| $\alpha$ [°]                                              | 90                                                                                             | 90                                                             | 107.251(3)                                                                             | 90                                                                                    | 90                                                                                   |
| $\beta$ [°]                                               | 100.252(2)                                                                                     | 107.404(4)                                                     | 94.748(3)                                                                              | 96.218(2)                                                                             | 93.0360(10)                                                                          |
| $\gamma$ [°]                                              | 90                                                                                             | 90                                                             | 110.515(3)                                                                             | 90                                                                                    | 90                                                                                   |
| <i>V</i> [Å <sup>3</sup> ]                                | 3371.35(12)                                                                                    | 1650.51(11)                                                    | 3272.3(2)                                                                              | 4177.27(17)                                                                           | 1614.39(4)                                                                           |
| $\theta$ [°]                                              | 4.025 to 72.726                                                                                | 3.238 to 72.278                                                | 2.747 to 72.529                                                                        | 3.980 to 72.544                                                                       | 3.541 to 72.586                                                                      |
| <i>h</i>                                                  | -19 to 19                                                                                      | -18 to 18                                                      | -17 to 17                                                                              | -40 to 37                                                                             | -15 to 8                                                                             |
| <i>k</i>                                                  | -19 to 18                                                                                      | -6 to 6                                                        | -13 to 18                                                                              | -14 to 10                                                                             | -17 to 16                                                                            |
| <i>l</i>                                                  | -17 to 11                                                                                      | -17 to 25                                                      | -21 to 16                                                                              | -13 to 10                                                                             | -11 to 11                                                                            |
| <i>F</i> (000)                                            | 1472                                                                                           | 840                                                            | 2120                                                                                   | 2000                                                                                  | 968                                                                                  |
| $\mu$ (Cu-K $\alpha$ ) [mm <sup>-1</sup> ]                | 0.970                                                                                          | 7.077                                                          | 15.146                                                                                 | 7.726                                                                                 | 9.973                                                                                |
| crystal size [mm]                                         | 0.451 × 0.131 × 0.099                                                                          | 0.107 × 0.078 × 0.031                                          | 0.075 × 0.062 × 0.026                                                                  | 0.366 × 0.083 × 0.081                                                                 | 0.248 × 0.115 × 0.076                                                                |
| <i>D</i> <sub>c</sub> [g cm <sup>-3</sup> ], <i>T</i> [K] | 1.388, 99.99(10)                                                                               | 1.683, 99.9(3)                                                 | 2.267, 99.9(4)                                                                         | 1.602, 99.9(5)                                                                        | 2.015, 99.9(4)                                                                       |
| reflections collected                                     | 9810                                                                                           | 7946                                                           | 21454                                                                                  | 8112                                                                                  | 5952                                                                                 |
| independent reflections                                   | 3302                                                                                           | 3171                                                           | 12476                                                                                  | 4030                                                                                  | 3100                                                                                 |
| obs. Reflections, <i>I</i> > 2 $\sigma$ <i>I</i>          | 2949                                                                                           | 2540                                                           | 10901                                                                                  | 3810                                                                                  | 2970                                                                                 |
| Parameters, restraints                                    | 348, 296                                                                                       | 246, 0                                                         | 1008, 0                                                                                | 262, 19                                                                               | 260, 21                                                                              |
| weight parameter <i>a</i>                                 | 0.0652                                                                                         | 0.0382                                                         | 0.0291                                                                                 | 0.0611                                                                                | 0.0458                                                                               |
| weight parameter <i>b</i>                                 | 4.7913                                                                                         | 0.4141                                                         | 1.6826                                                                                 | 19.7346                                                                               | 1.4266                                                                               |
| <i>R</i> <sub>1</sub> (observed)                          | 0.0508                                                                                         | 0.0415                                                         | 0.0305                                                                                 | 0.0423                                                                                | 0.0290                                                                               |
| <i>R</i> <sub>1</sub> (overall)                           | 0.0552                                                                                         | 0.0589                                                         | 0.0381                                                                                 | 0.0438                                                                                | 0.0300                                                                               |
| <i>wR</i> <sub>2</sub> (observed)                         | 0.1306                                                                                         | 0.0907                                                         | 0.0698                                                                                 | 0.1113                                                                                | 0.0759                                                                               |
| <i>wR</i> <sub>2</sub> (overall)                          | 0.1345                                                                                         | 0.0991                                                         | 0.0733                                                                                 | 0.1128                                                                                | 0.0768                                                                               |
| diff. peak/hole [e/Å]                                     | 0.713/ -0.379                                                                                  | 0.392/ -0.346                                                  | 1.894/ -1.299                                                                          | 1.207/ -0.778                                                                         | 0.970/ -1.058                                                                        |
| goodness-of-fit on <i>F</i> <sup>2</sup>                  | 1.061                                                                                          | 1.040                                                          | 1.036                                                                                  | 1.041                                                                                 | 1.058                                                                                |

**Table S3.** Selected bond lengths and angles of molecular structure of H<sub>3</sub>bcpza (**2**).

| Selected bond lengths [Å] | H <sub>3</sub> bcpza ( <b>2</b> ) |
|---------------------------|-----------------------------------|
| C2–O1                     | 1.275(3)                          |
| C2–O2                     | 1.232(3)                          |
| N11–N12                   | 1.362(2)                          |
| N11–C12                   | 1.324(2)                          |
| C12–C13                   | 1.406(2)                          |
| O11–C16                   | 1.322(2)                          |
| O12–C16                   | 1.216(2)                          |
| Selected angles [°]       |                                   |
| N12–C1–C2                 | 111.63(14)                        |
| N11–N12–C1                | 118.85(13)                        |

**Table S4.** Selected bond lengths and angles of molecular structure of [Mn(H<sub>2</sub>bcpza)(CO)<sub>3</sub>] (**4**).

| Selected bond lengths [Å] | [Mn(H <sub>2</sub> bcpza)(CO) <sub>3</sub> ] ( <b>4</b> ) |
|---------------------------|-----------------------------------------------------------|
| Mn–O1                     | 2.061(2)                                                  |
| Mn–N11                    | 2.041(3)                                                  |
| Mn–N21                    | 2.051(2)                                                  |
| Mn–C3                     | 1.818(3)                                                  |
| Mn–C4                     | 1.809(3)                                                  |
| Mn–C5                     | 1.809(3)                                                  |
| Selected angles [°]       |                                                           |
| O1–Mn–N11                 | 85.61(9)                                                  |
| O1–Mn–N21                 | 84.72(9)                                                  |
| N11–Mn–N21                | 84.54(10)                                                 |

**Table S5.** Selected bond lengths and angles of molecular structure of  $[\text{Re}(\text{H}_2\text{bcpza})(\text{CO})_3]$  (**5**). The four independent molecules in the asymmetric unit are marked with superscripts **a-d**.

| Selected bond lengths [Å] | $[\text{Re}(\text{H}_2\text{bcpza})(\text{CO})_3]$ ( <b>5</b> )                                   |
|---------------------------|---------------------------------------------------------------------------------------------------|
| Re–O1                     | 2.189(3) <sup>a</sup> , 2.154(3) <sup>b</sup> , 2.168(3) <sup>c</sup> , 2.172(4) <sup>d</sup>     |
| Re–N11                    | 2.181(4) <sup>a</sup> , 2.187(4) <sup>b</sup> , 2.182(4) <sup>c</sup> , 2.194(5) <sup>d</sup>     |
| Re–N21                    | 2.183(5) <sup>a</sup> , 2.163(4) <sup>b</sup> , 2.186(4) <sup>c</sup> , 2.158(4) <sup>d</sup>     |
| Re–C3                     | 1.937(6) <sup>a</sup> , 1.927(6) <sup>b</sup> , 1.924(6) <sup>c</sup> , 1.937(6) <sup>d</sup>     |
| Re–C4                     | 1.903(6) <sup>a</sup> , 1.909(6) <sup>b</sup> , 1.902(6) <sup>c</sup> , 1.905(6) <sup>d</sup>     |
| Re–C5                     | 1.915(6) <sup>a</sup> , 1.916(6) <sup>b</sup> , 1.929(5) <sup>c</sup> , 1.945(6) <sup>d</sup>     |
| Selected angles [°]       |                                                                                                   |
| O1–Re–N11                 | 81.80(14) <sup>a</sup> , 82.83(14) <sup>b</sup> , 80.80(14) <sup>c</sup> , 78.80(15) <sup>d</sup> |
| O1–Re–N21                 | 80.17(15) <sup>a</sup> , 80.30(15) <sup>b</sup> , 80.82(14) <sup>c</sup> , 83.44(15) <sup>d</sup> |
| N11–Re–N21                | 80.61(16) <sup>a</sup> , 82.68(15) <sup>b</sup> , 82.04(15) <sup>c</sup> , 82.08(16) <sup>d</sup> |

**Table S6.** Selected distances and angles of molecular structure of  $[\text{Ru}(\text{H}_2\text{bcpza})\text{Cl}(\text{CO})_2]$  (**6a-1** + **6a-2**).

| Selected bond lengths [Å] | $[\text{Ru}(\text{H}_2\text{bcpza})\text{Cl}(\text{CO})_2]$ ( <b>6a-1</b> ) | $[\text{Ru}(\text{H}_2\text{bcpza})\text{Cl}(\text{CO})_2]$ ( <b>6a-2</b> ) |
|---------------------------|-----------------------------------------------------------------------------|-----------------------------------------------------------------------------|
| Ru–O1                     | 2.108(3)                                                                    | 2.1123(19)                                                                  |
| Ru–N11                    | 2.118(3)                                                                    | 2.118(2)                                                                    |
| Ru–N21                    | 2.099(3)                                                                    | 2.131(2)                                                                    |
| Ru–C3                     | 1.956(5)                                                                    | 1.934(3)                                                                    |
| Ru–C4                     | 1.919(4)                                                                    | 1.910(3)                                                                    |
| Ru–Cl                     | 2.3690(11)                                                                  | 2.3596(8)                                                                   |
| Selected angles [°]       |                                                                             |                                                                             |
| O1–Ru–N11                 | 85.28(11)                                                                   | 85.24(8)                                                                    |
| N21–Ru–O1                 | 85.50(11)                                                                   | 85.47(7)                                                                    |
| N21–Ru–N11                | 83.78(12)                                                                   | 83.76(9)                                                                    |

## 2. $^1\text{H}$ NMR and $^{13}\text{C}$ NMR spectra

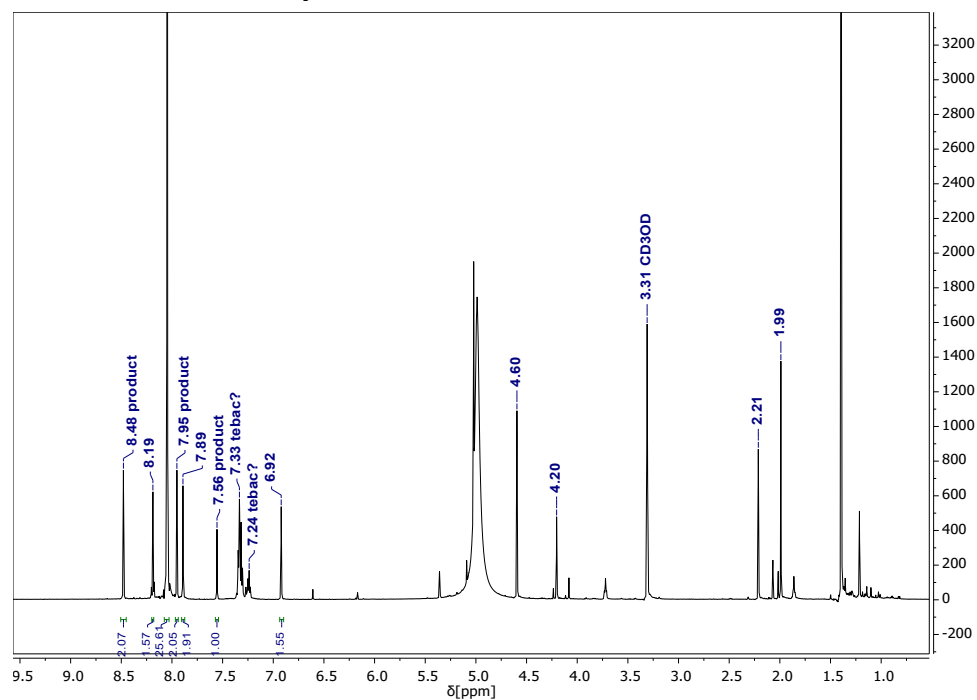

**Figure S1.**  $^1\text{H}$  NMR spectrum (methanol- $\text{d}_4$ ) of the extracted organic phase regarding the attempted synthesis of  $\text{H}_3\text{bcpza}$  (**2**) by using pyrazole-4-carboxylic acid as precursor.

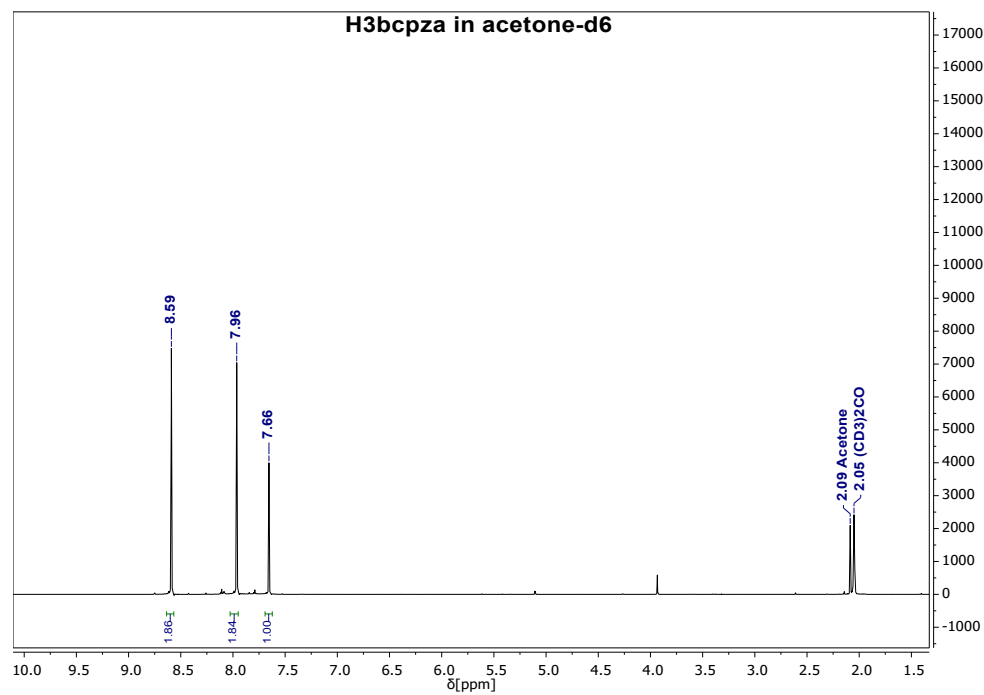

**Figure S2.**  $^1\text{H}$  NMR spectrum of  $\text{H}_3\text{bcpza}$  (**2**) in acetone- $\text{d}_6$ .

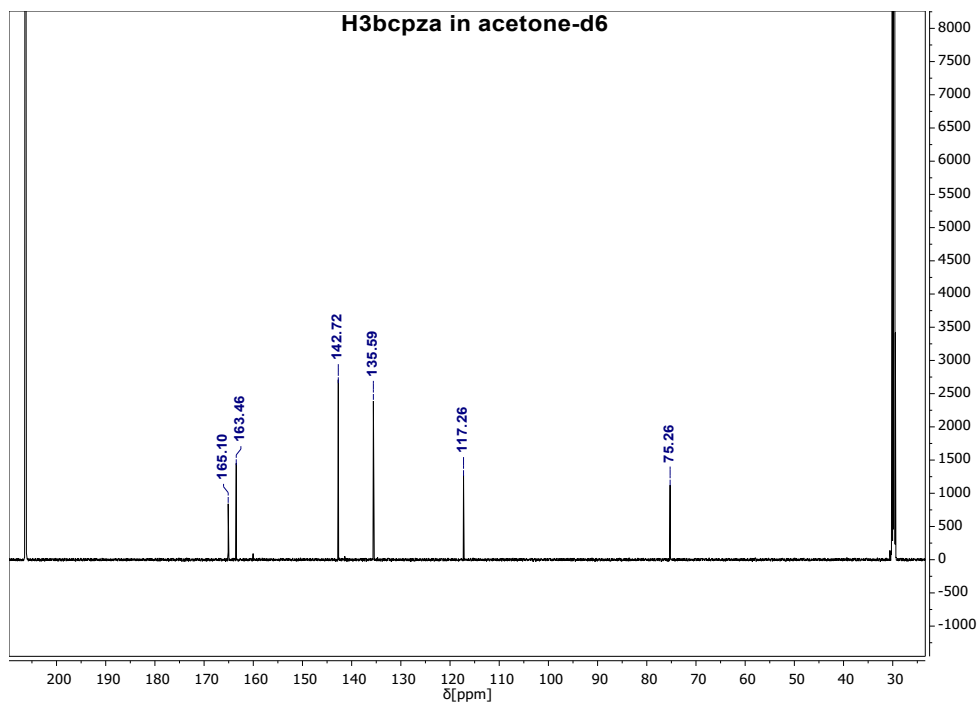

Figure S3.  $^{13}\text{C}$  NMR spectrum of H<sub>3</sub>bcpza (**2**) in acetone-d<sub>6</sub>.

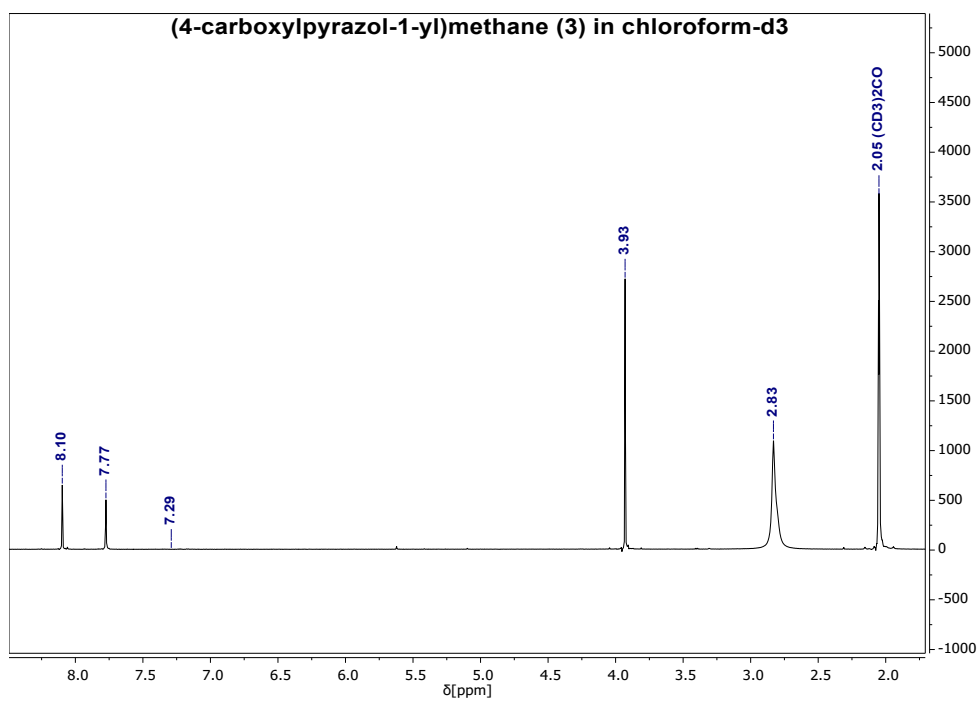

Figure S4.  $^1\text{H}$  NMR spectrum of (4-carboxypyrazol-1-yl)methane (**3**) in chloroform-d<sub>3</sub>.

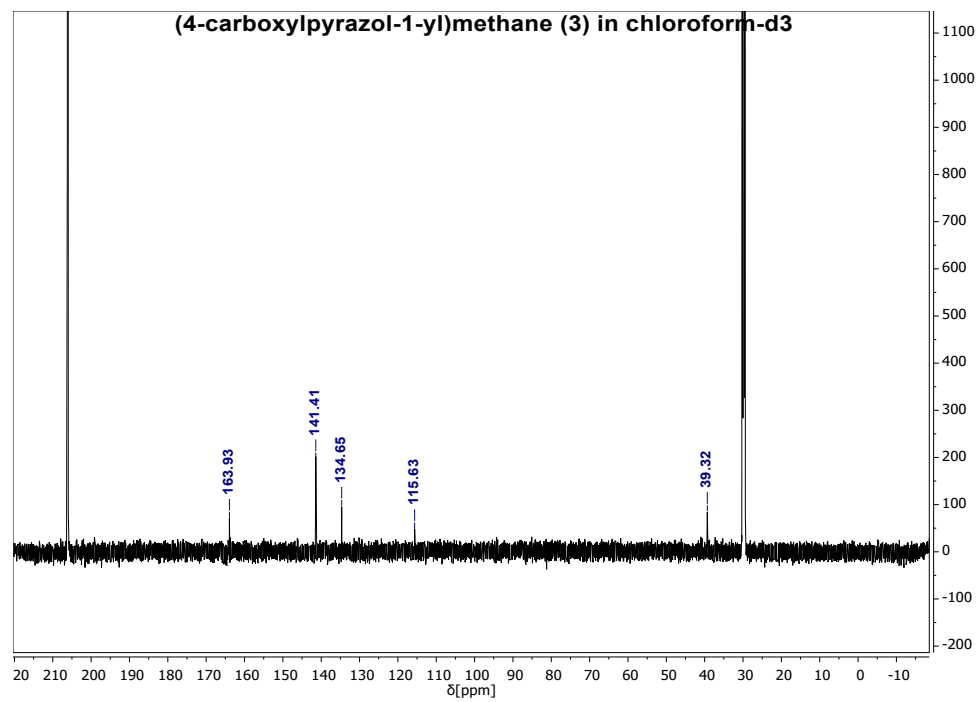

Figure S5. <sup>13</sup>C NMR spectrum of (4-carboxypyrazol-1-yl)methane (**3**) in chloroform-d<sub>3</sub>.



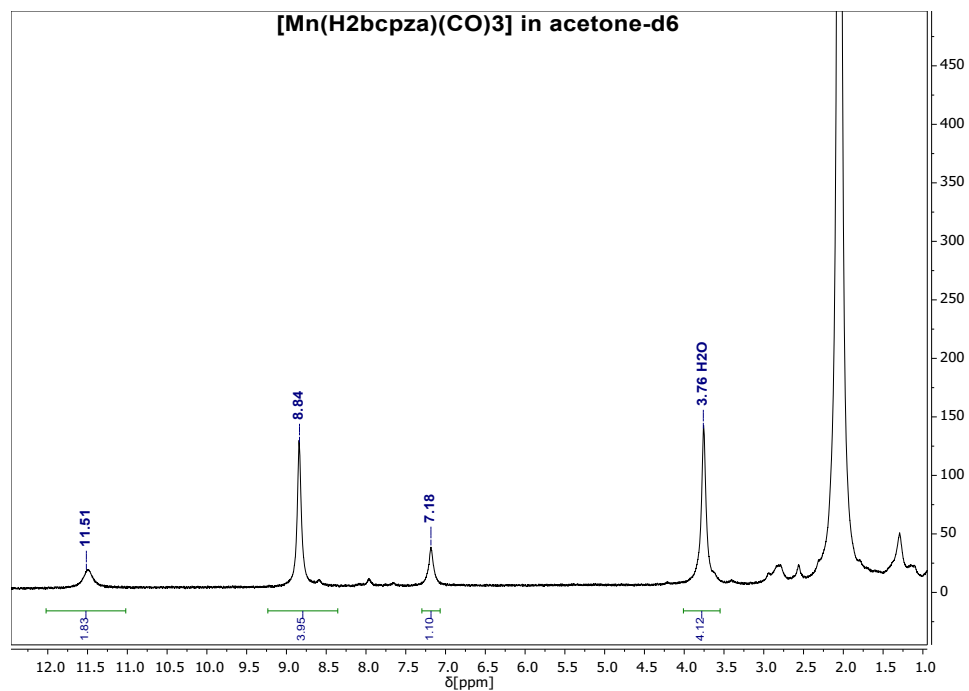

Figure S6. <sup>1</sup>H NMR spectrum of [Mn(H<sub>2</sub>bcpza)(CO)<sub>3</sub>] (**4**) in acetone-d<sub>6</sub>.

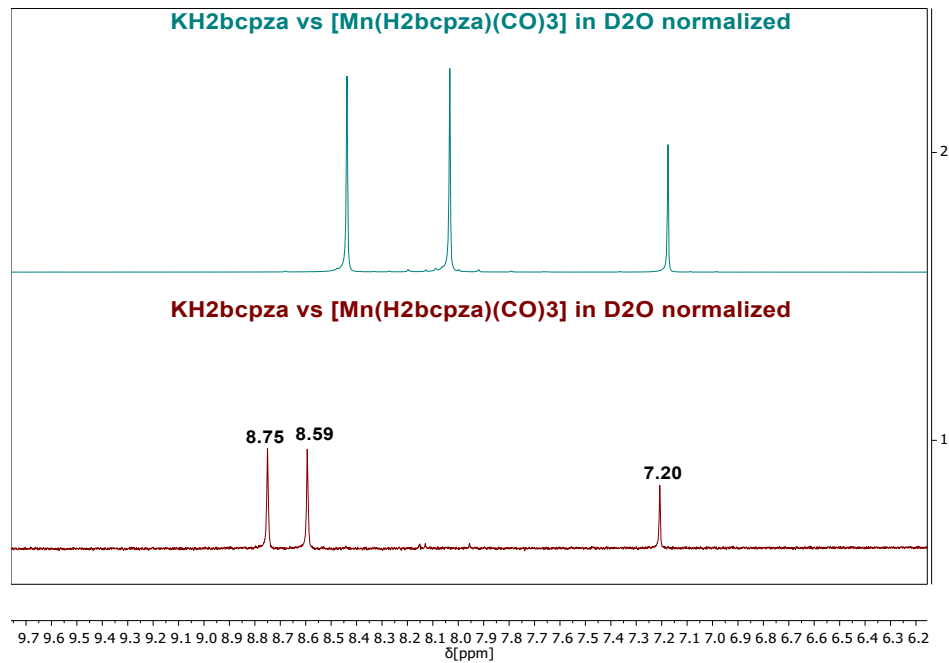

Figure S7. <sup>1</sup>H NMR of KH<sub>2</sub>bcpza in D<sub>2</sub>O (top) and [Mn(H<sub>2</sub>bcpza)(CO)<sub>3</sub>] (**4**) in D<sub>2</sub>O (bottom, normalized).

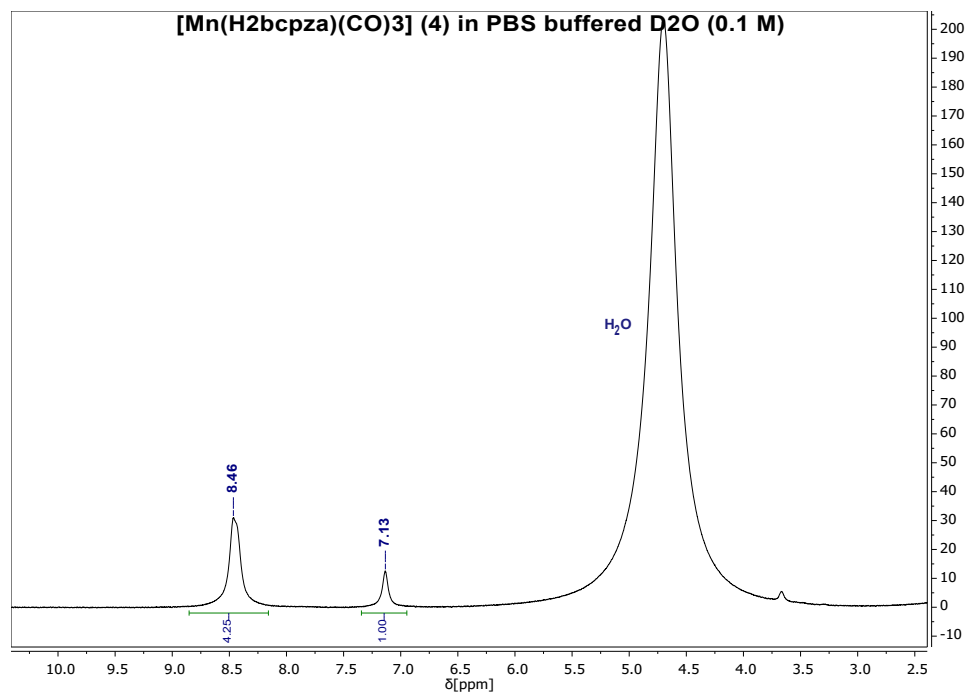

**Figure S8.** <sup>1</sup>H NMR spectrum of [Mn(H<sub>2</sub>bcpza)(CO)<sub>3</sub>] (**4**) in PBS buffered D<sub>2</sub>O (0.1 M).

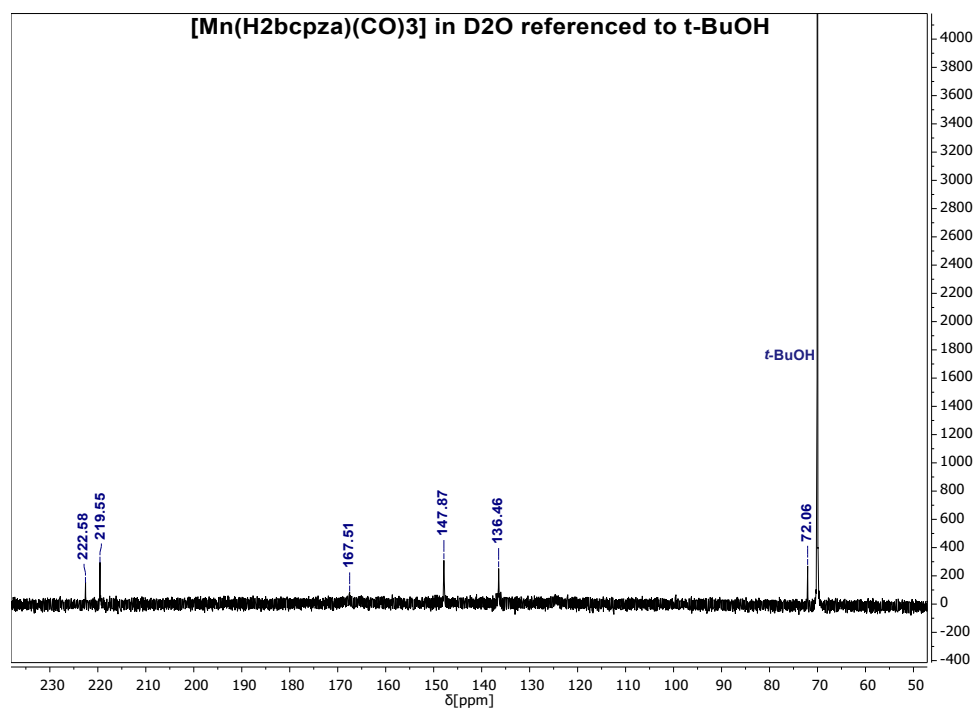

**Figure S9.** <sup>13</sup>C NMR spectrum of [Mn(H<sub>2</sub>bcpza)(CO)<sub>3</sub>] (**4**) in PBS buffered (0.1 M) D<sub>2</sub>O referenced to *t*-BuOH. The second carboxyl group as well as the quaternary carbon atom C<sup>4</sup><sub>pz</sub> could not be resolved.

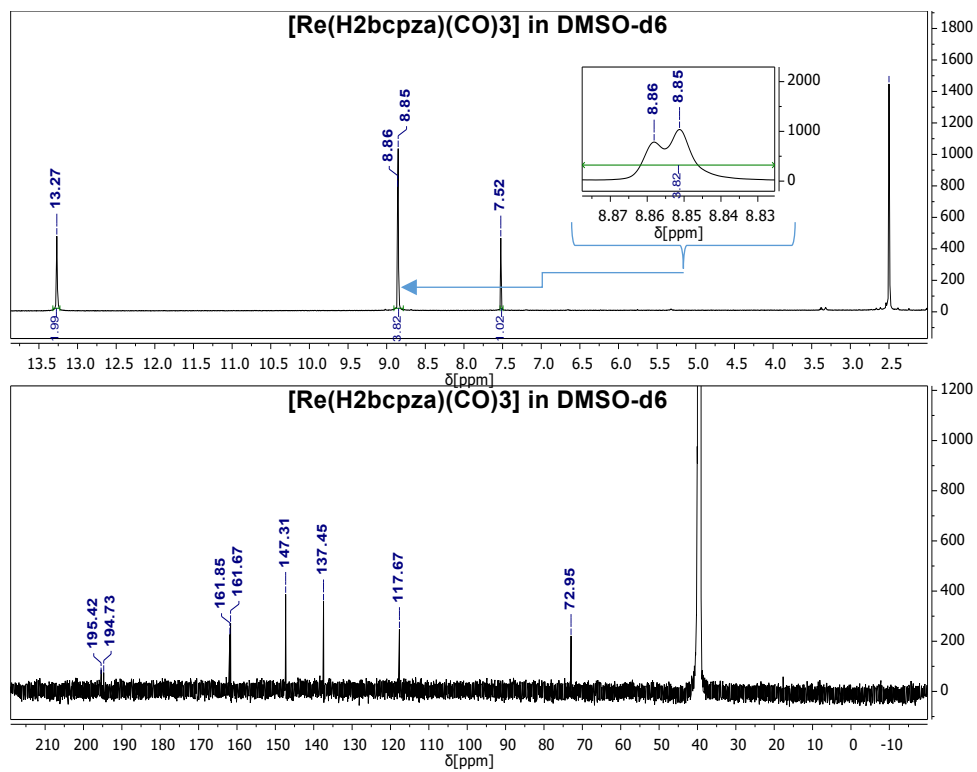

Figure S10.  $^1\text{H}$  &  $^{13}\text{C}$  NMR spectrum of  $[\text{Re}(\text{H}_2\text{bcpza})(\text{CO})_3]$  (5) in  $\text{dmsO-d}_6$ .

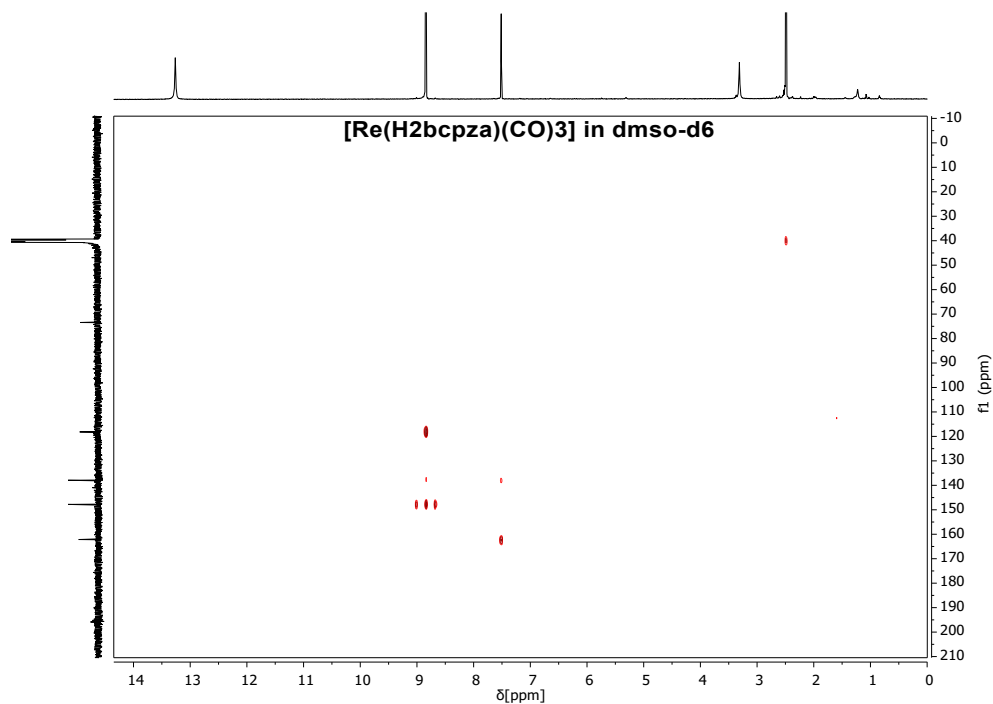

Figure S11. 2D HMBC spectrum of  $[\text{Re}(\text{H}_2\text{bcpza})(\text{CO})_3]$  (5) in  $\text{dmsO-d}_6$ .

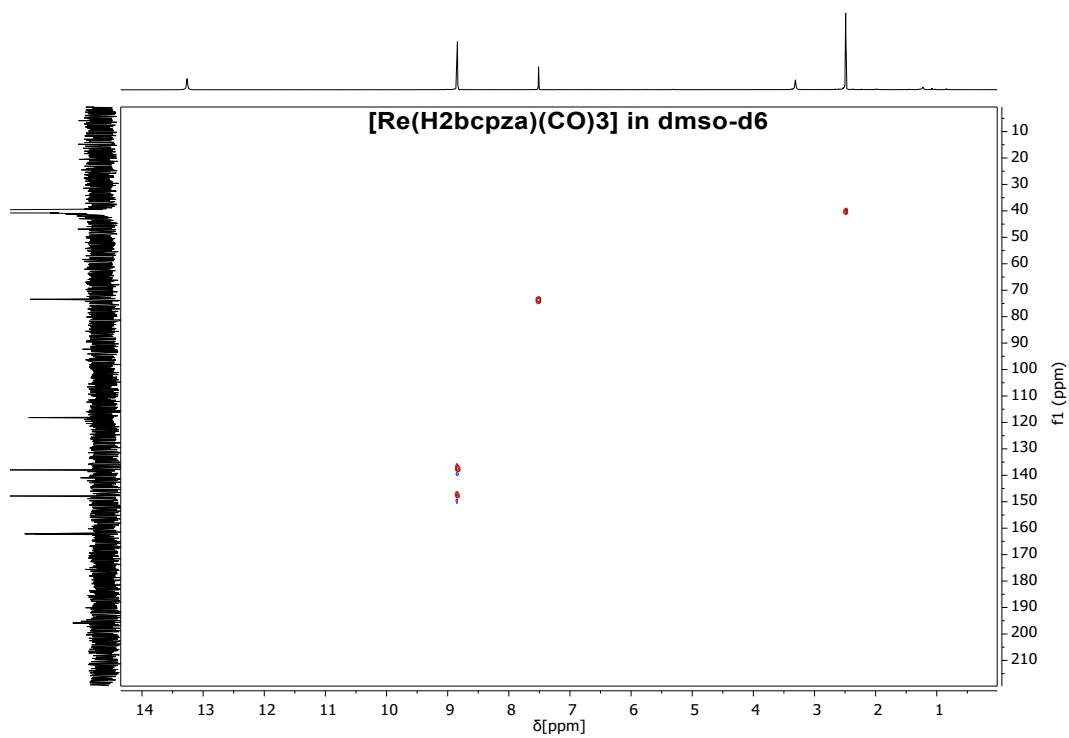

Figure S12. 2D HSQC spectrum of  $[\text{Re}(\text{H}_2\text{bcpza})(\text{CO})_3]$  (**5**) in  $\text{dms0-d}_6$ .

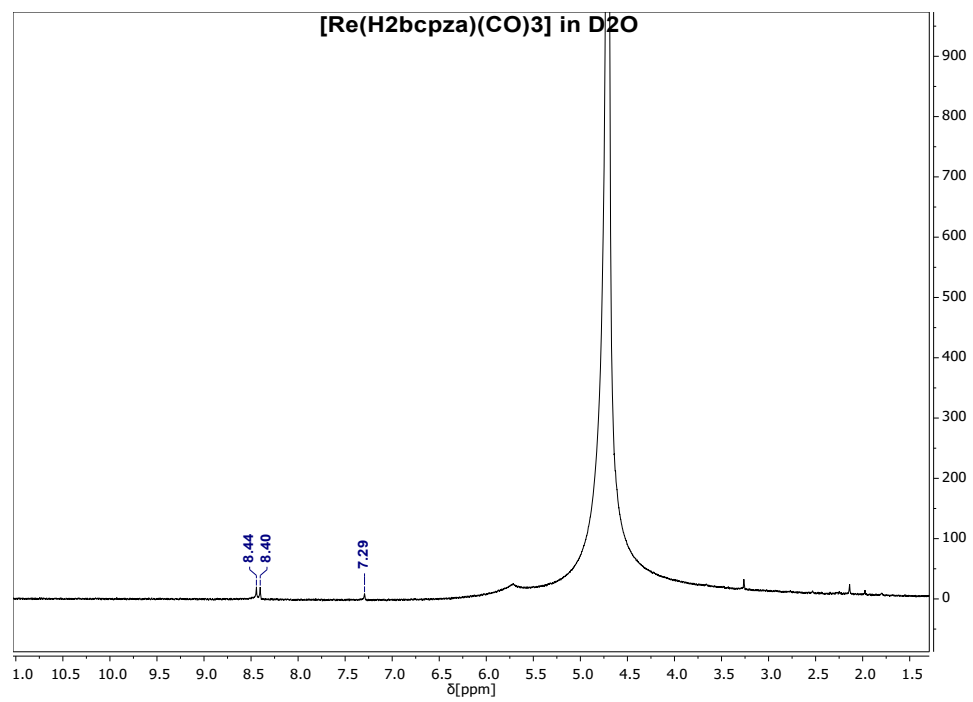

Figure S13.  $^1\text{H}$  NMR spectrum of  $[\text{Re}(\text{H}_2\text{bcpza})(\text{CO})_3]$  (**5**) in  $\text{D}_2\text{O}$ .

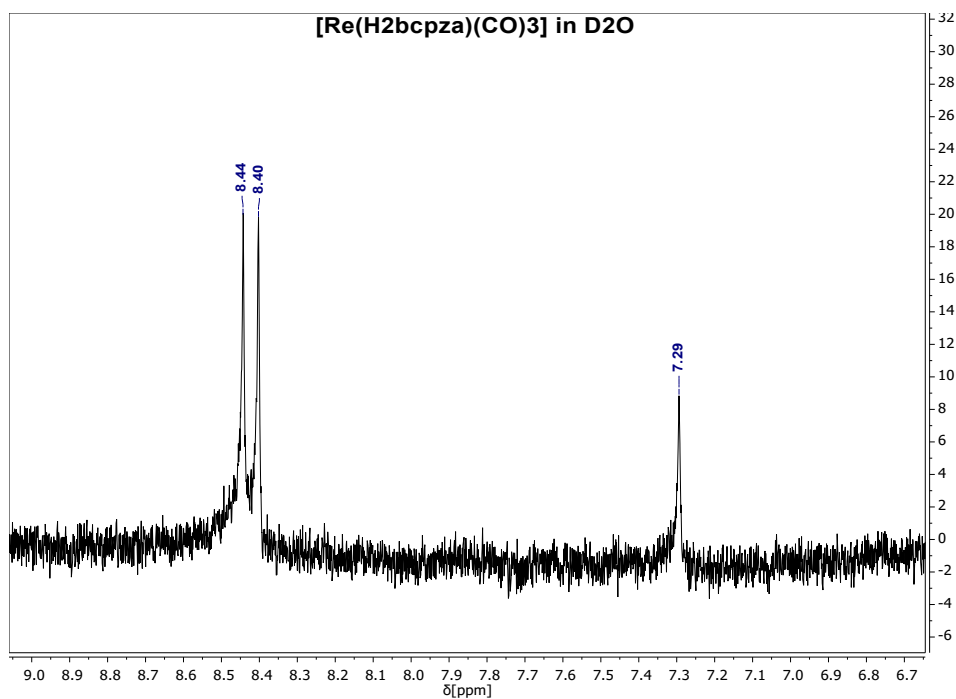

Figure S14. <sup>1</sup>H NMR spectrum of [Re(H<sub>2</sub>bcpza)(CO)<sub>3</sub>] (5) in D<sub>2</sub>O.

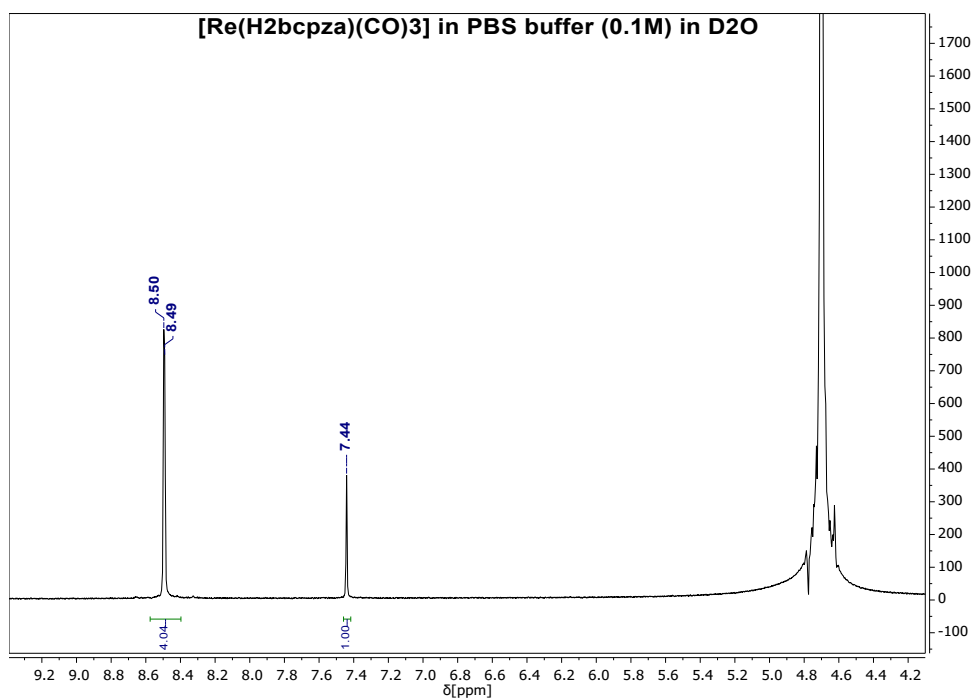

Figure S15. <sup>13</sup>C NMR spectrum of [Re(H<sub>2</sub>bcpza)(CO)<sub>3</sub>] (5) in PBS buffered (0.1M) D<sub>2</sub>O.

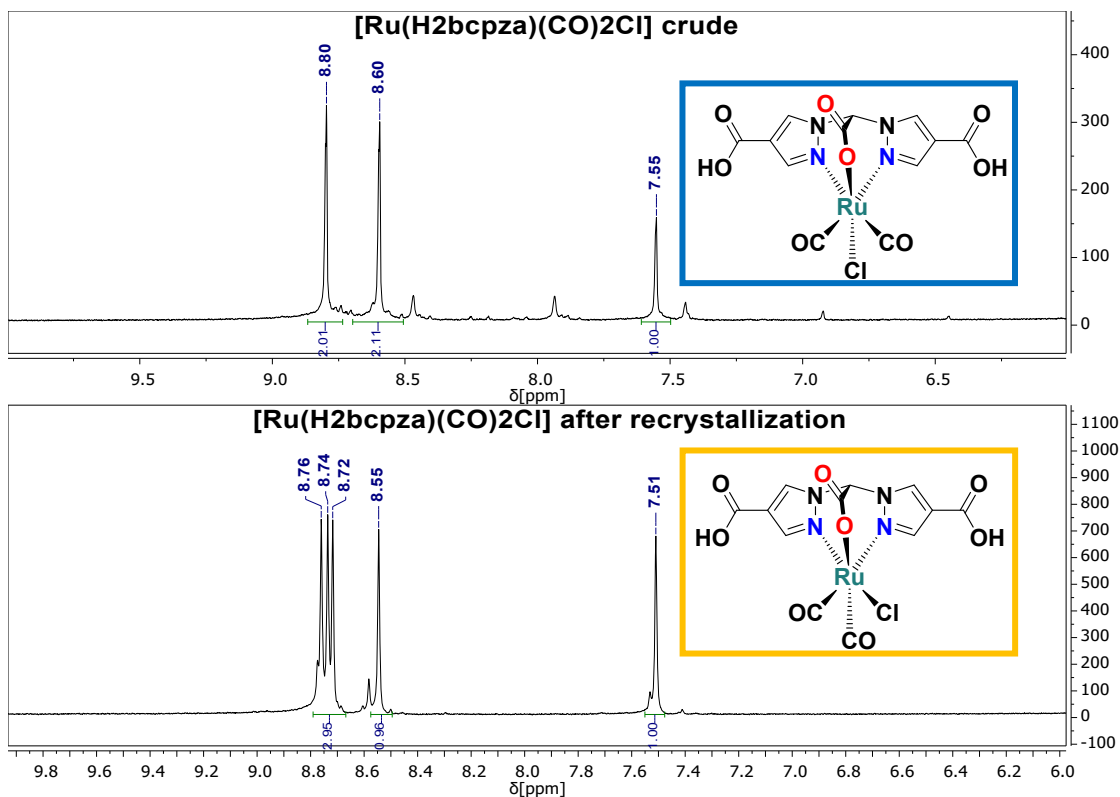

**Figure S16.** Top:  $^1\text{H}$  NMR spectrum of the crude product  $[\text{Ru}(\text{H}_2\text{bcpza})\text{Cl}(\text{CO})_2]$  obtained by removing the solvent of the reaction mixture. The spectrum was recorded in methanol- $\text{d}_4$  and mainly displays the symmetric isomer  $[\text{Ru}(\text{H}_2\text{bcpza})\text{Cl}(\text{CO})_2]$  (**6a**). Bottom:  $^1\text{H}$  NMR spectrum of the asymmetric  $[\text{Ru}(\text{H}_2\text{bcpza})\text{Cl}(\text{CO})_2]$  (**6b**) obtained after purification of **6a** and subsequent recrystallization from methanol. The spectrum was recorded in methanol- $\text{d}_4$ .

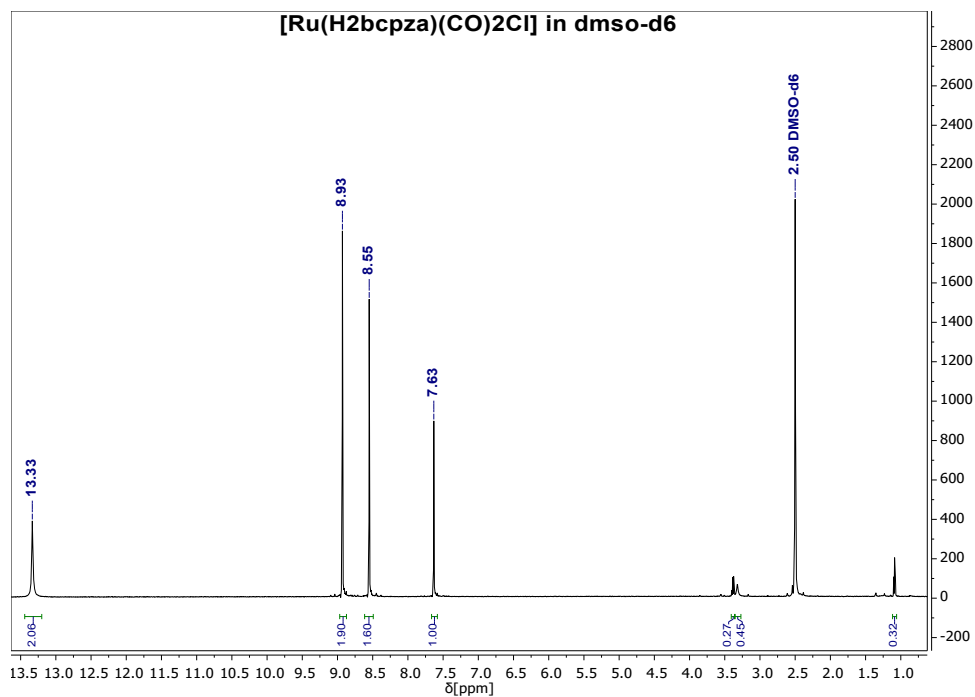

Figure S17. <sup>1</sup>H NMR spectrum of [Ru(H<sub>2</sub>bcpza)Cl(CO)<sub>2</sub>] (6a) in dms0-d<sub>6</sub>.

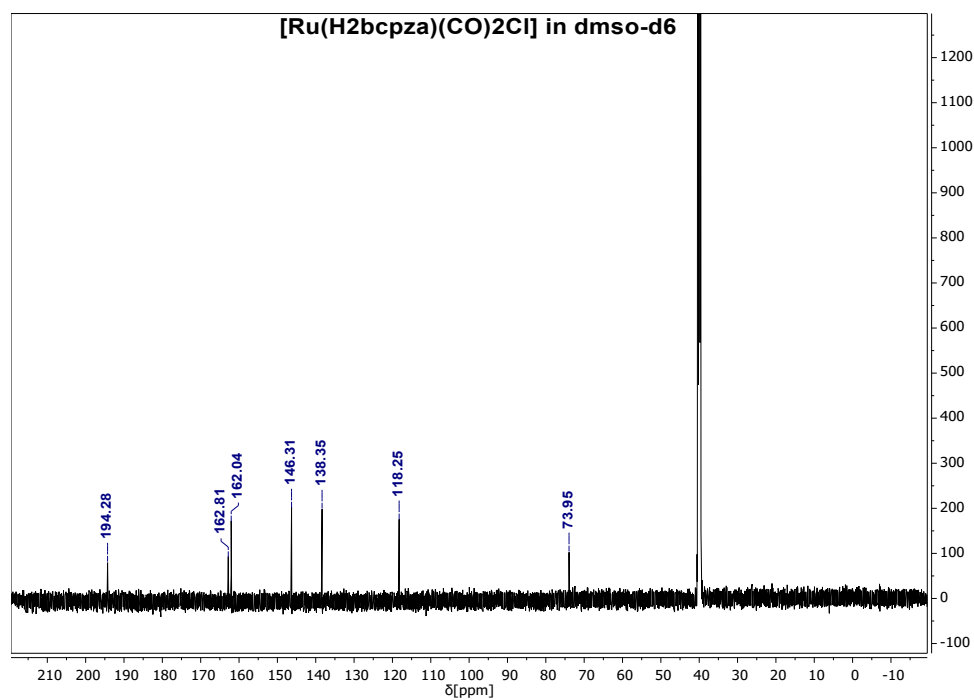

Figure S18. <sup>13</sup>C NMR spectrum of [Ru(H<sub>2</sub>bcpza)Cl(CO)<sub>2</sub>] (6a) in dms0-d<sub>6</sub>.

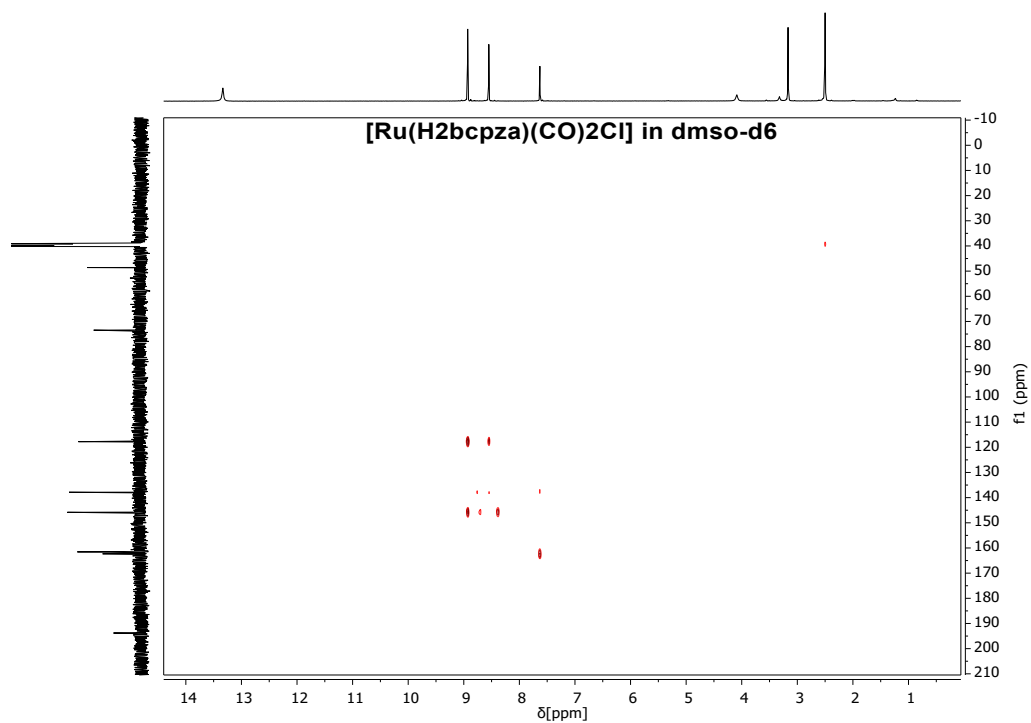

Figure S19. 2D HMBC spectrum of  $[\text{Ru}(\text{H}_2\text{bcpza})\text{Cl}(\text{CO})_2]$  (**6a**) in  $\text{dms0-d}_6$ .

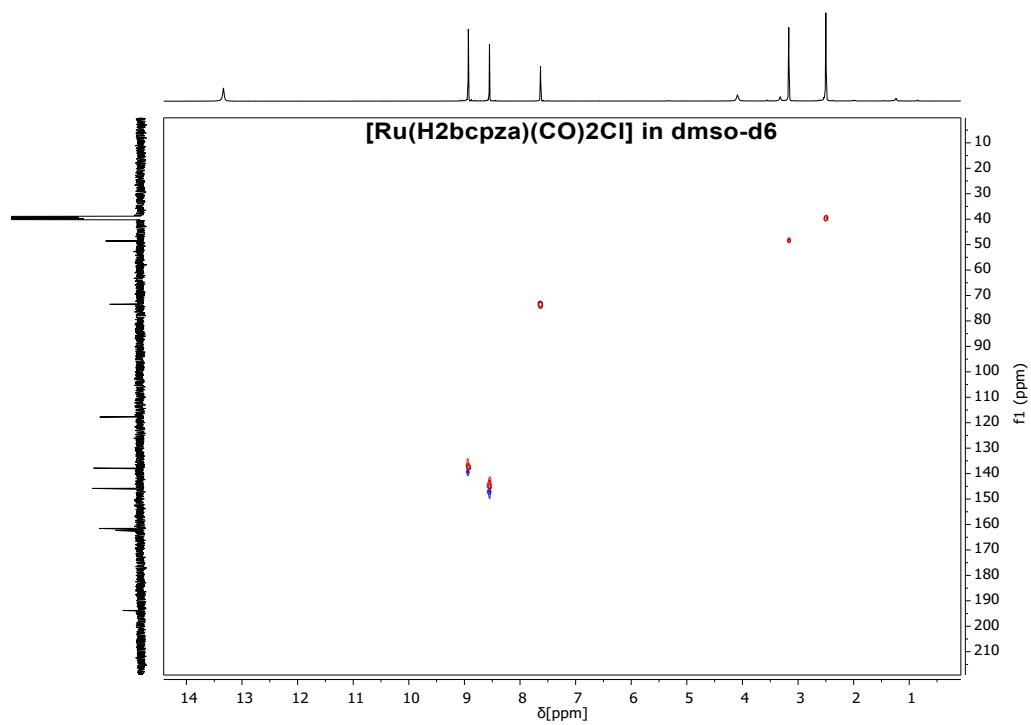

Figure S20. 2D HSQC spectrum of  $[\text{Ru}(\text{H}_2\text{bcpza})\text{Cl}(\text{CO})_2]$  (**6a**) in  $\text{dms0-d}_6$ .



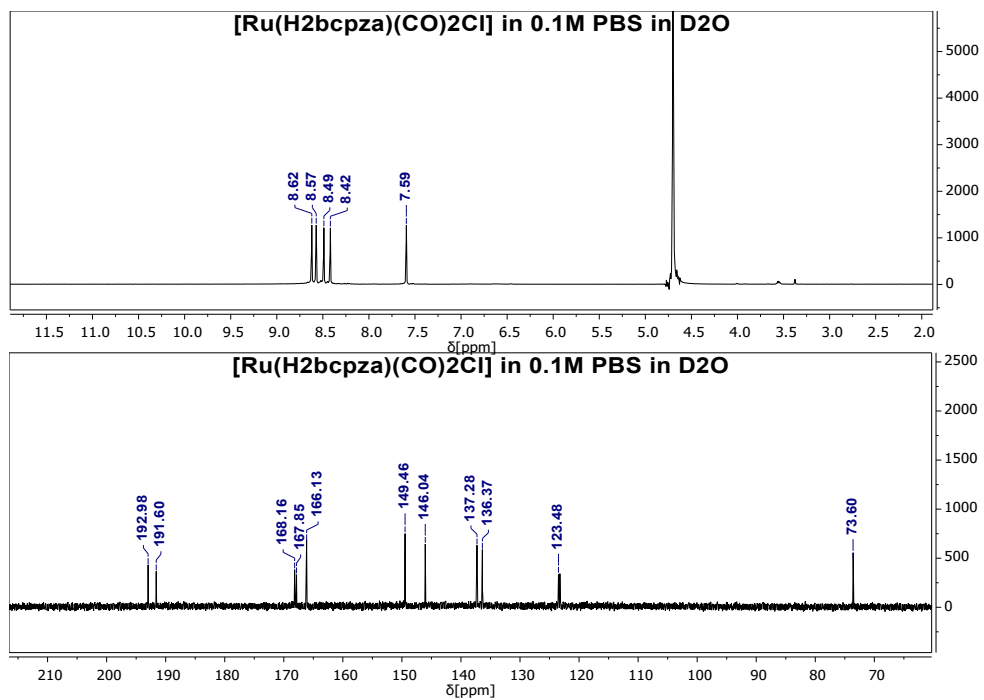

Figure S21.  $^1\text{H}$  &  $^{13}\text{C}$  NMR spectrum of  $[\text{Ru}(\text{H}_2\text{bcpza})\text{Cl}(\text{CO})_2]$  (**6b**) in PBS buffer (0.1 M) in  $\text{D}_2\text{O}$ .

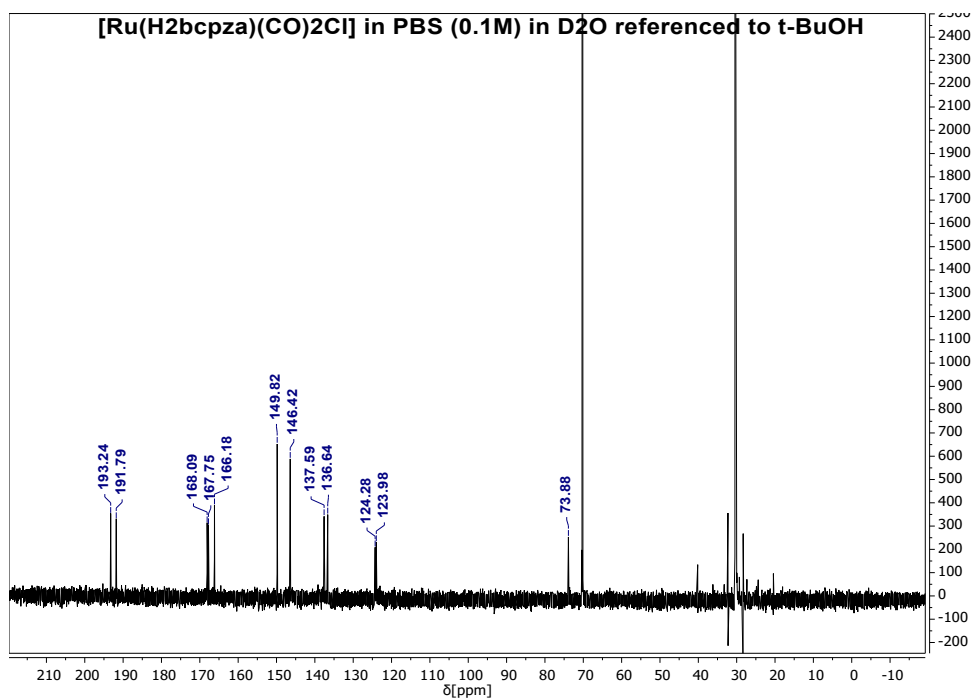

Figure S22.  $^{13}\text{C}$  NMR spectrum of  $[\text{Ru}(\text{H}_2\text{bcpza})\text{Cl}(\text{CO})_2]$  (**6b**) in PBS buffer (0.1 M) in  $\text{D}_2\text{O}$  referenced to  $t\text{-BuOH}$ .

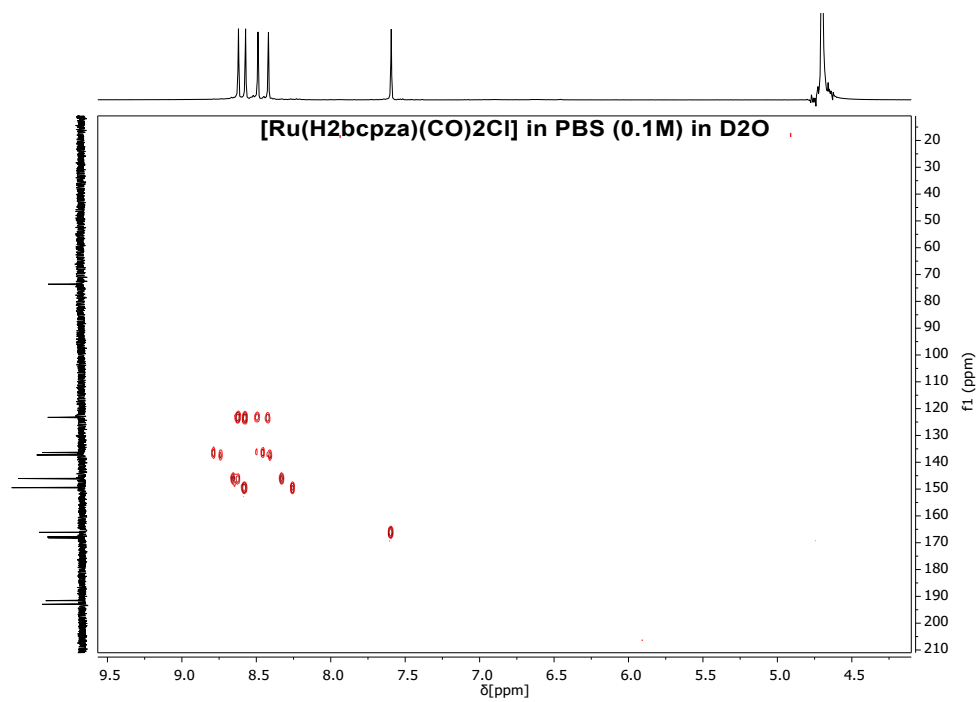

Figure S23. 2D HMBC spectrum of  $[\text{Ru}(\text{H}_2\text{bcpza})\text{Cl}(\text{CO})_2]$  (**6b**) in PBS buffer (0.1 M) in  $\text{D}_2\text{O}$ .

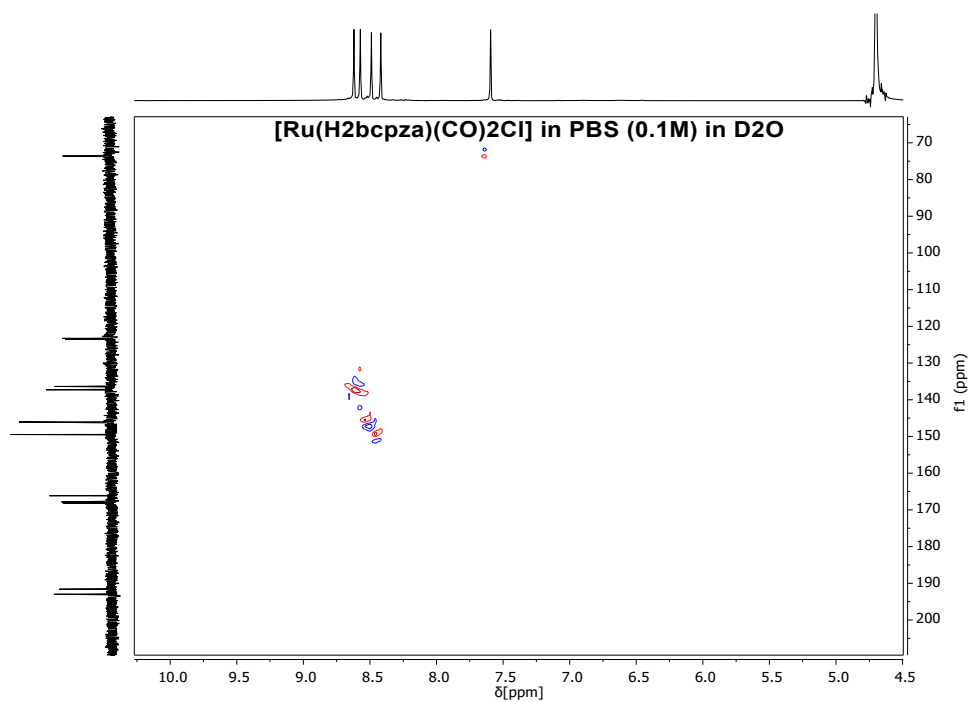

Figure S24. 2D HSQC spectrum of  $[\text{Ru}(\text{H}_2\text{bcpza})\text{Cl}(\text{CO})_2]$  (**6b**) in PBS buffer (0.1 M) in  $\text{D}_2\text{O}$ .

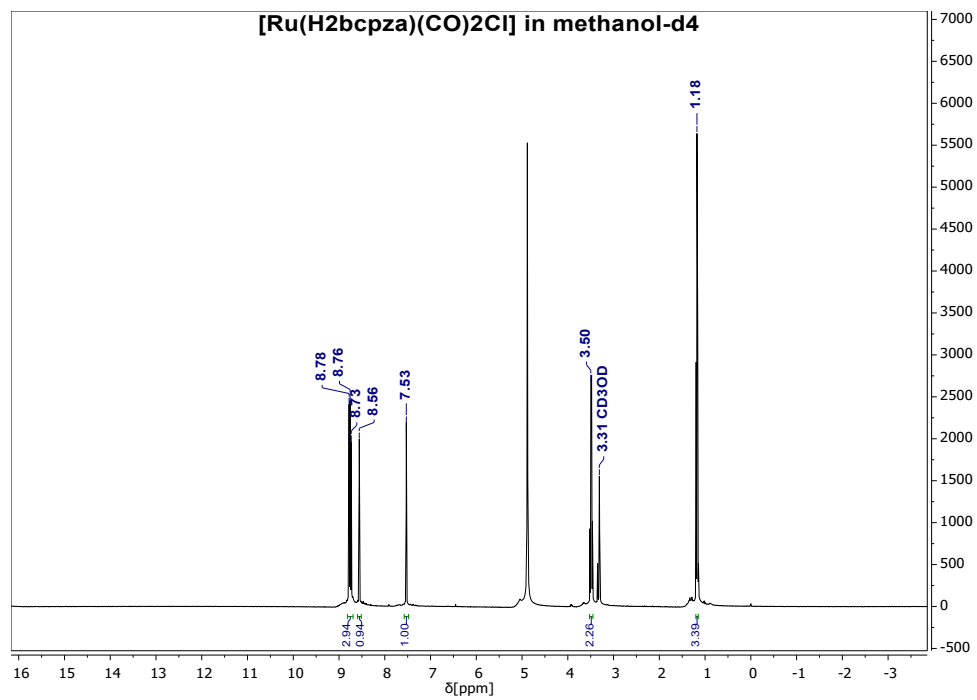

**Figure S25.** <sup>1</sup>H NMR spectrum of [Ru(H<sub>2</sub>bcpza)Cl(CO)<sub>2</sub>] (**6b**) in methanol-d<sub>4</sub>.

### 3. UV-vis spectra

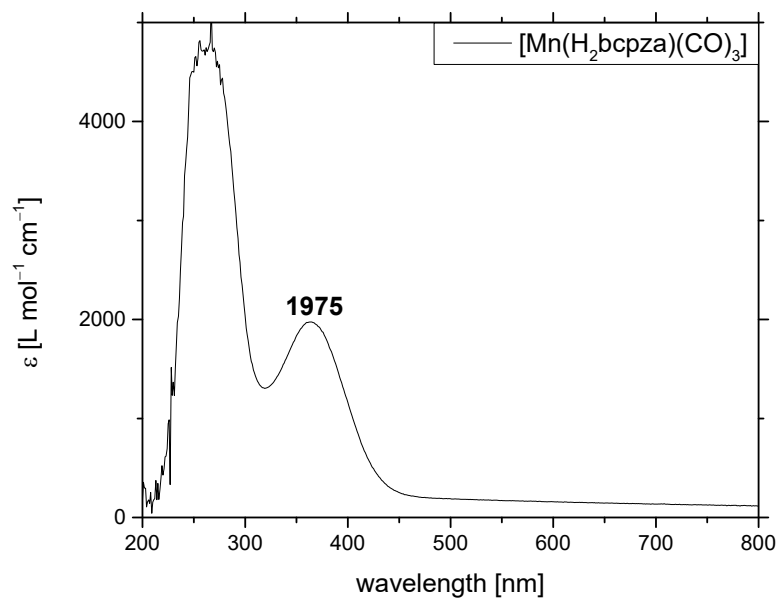

**Figure S26.** UV-vis spectrum of  $[\text{Mn}(\text{H}_2\text{bcpza})(\text{CO})_3]$  (**4**) (0.536 mM) in PBS buffer (0.1 M) with  $\epsilon_{363} = 1975 \text{ L mol}^{-1} \text{cm}^{-1}$ .

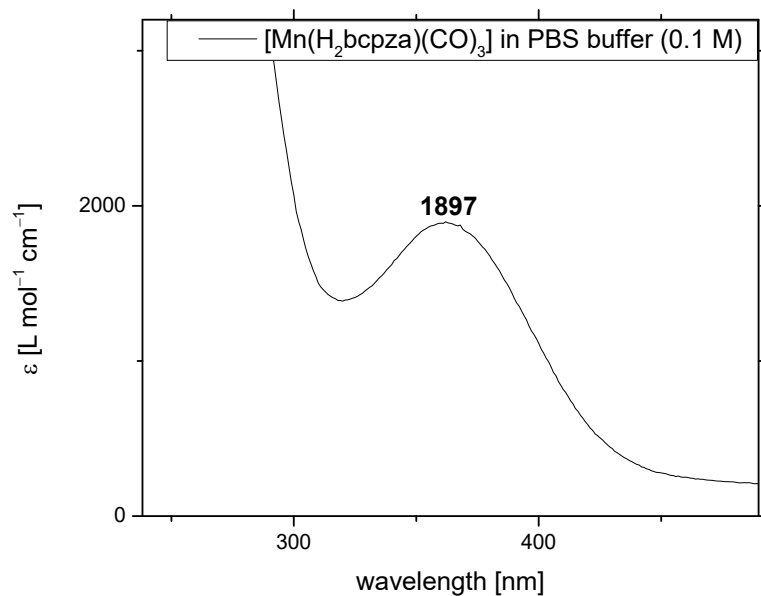

**Figure S27.** UV-vis spectrum of  $[\text{Mn}(\text{H}_2\text{bcpza})(\text{CO})_3]$  (**4**) (0.383 mM) in PBS buffer (0.1 M) with  $\epsilon_{363} = 1897 \text{ L mol}^{-1} \text{cm}^{-1}$ .

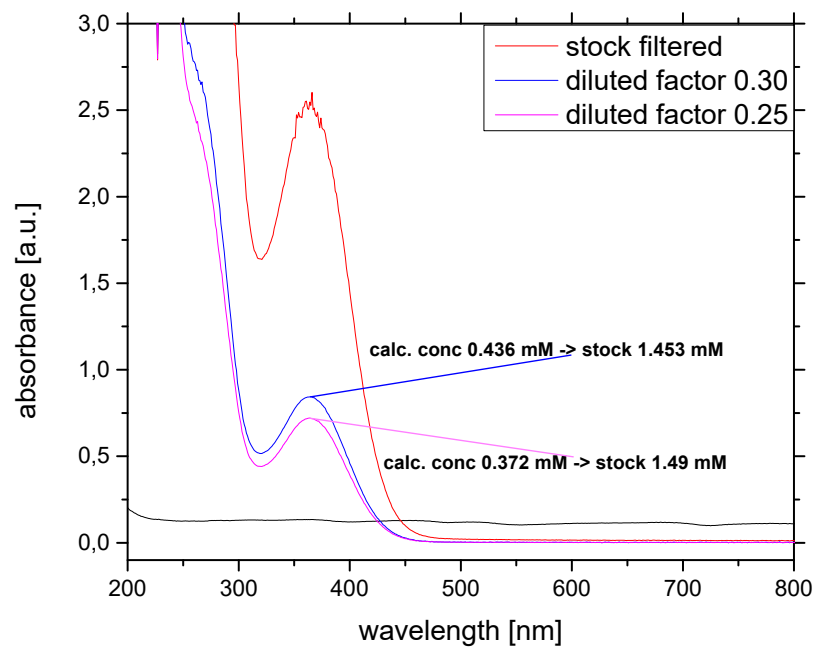

**Figure S28.** UV-vis spectrum of [Mn(H<sub>2</sub>bcpza)(CO)<sub>3</sub>] (4) in H<sub>2</sub>O with different dilutions of stock solution.

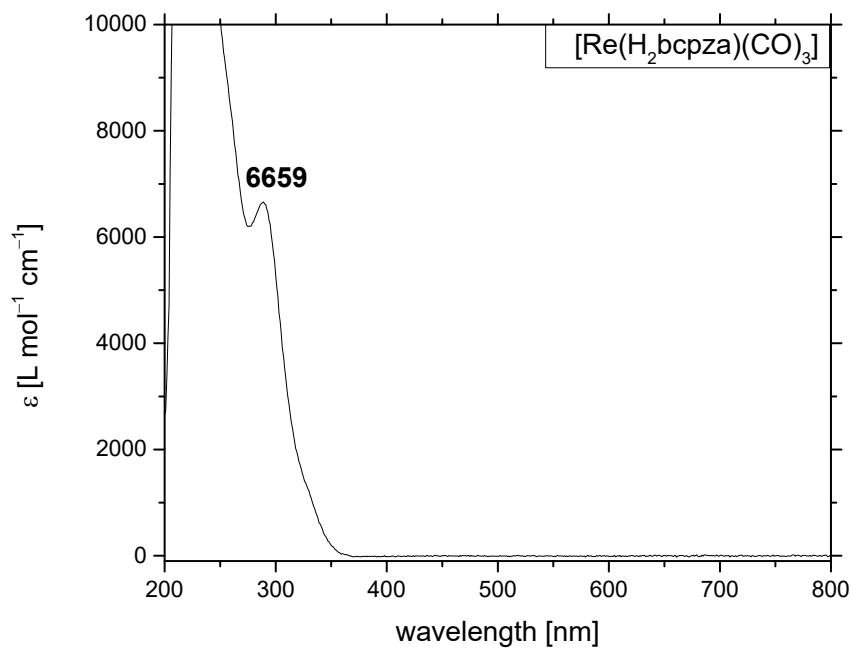

**Figure S29.** UV-vis spectrum of [Re(H<sub>2</sub>bcpza)(CO)<sub>3</sub>] (5) (0.0837 mM) in methanol.

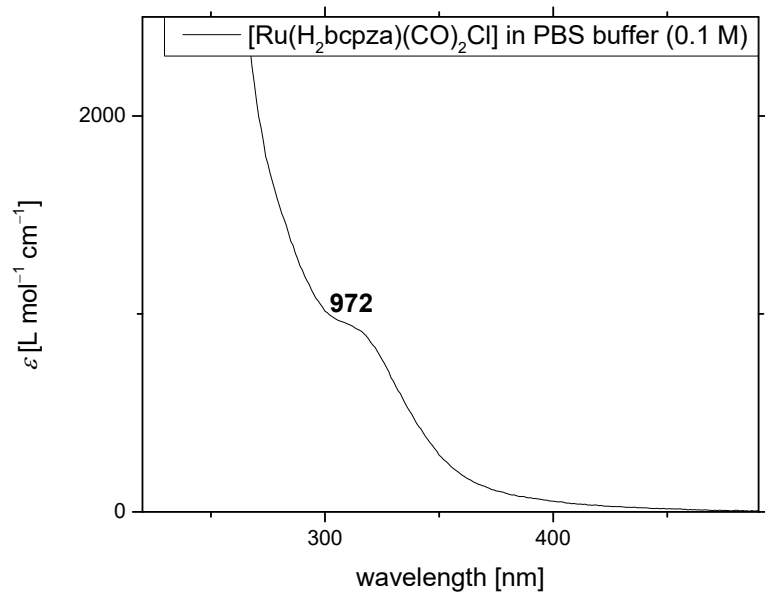

**Figure S30.** UV-vis spectrum of  $[\text{Ru}(\text{H}_2\text{bcpza})\text{Cl}(\text{CO})_2]$  (**6b**) (PBS 0.1 M).  $\lambda_{\text{max}}$  ( $\epsilon$  [ $\text{L mol}^{-1} \text{cm}^{-1}$ ]) = 310 (972) nm.

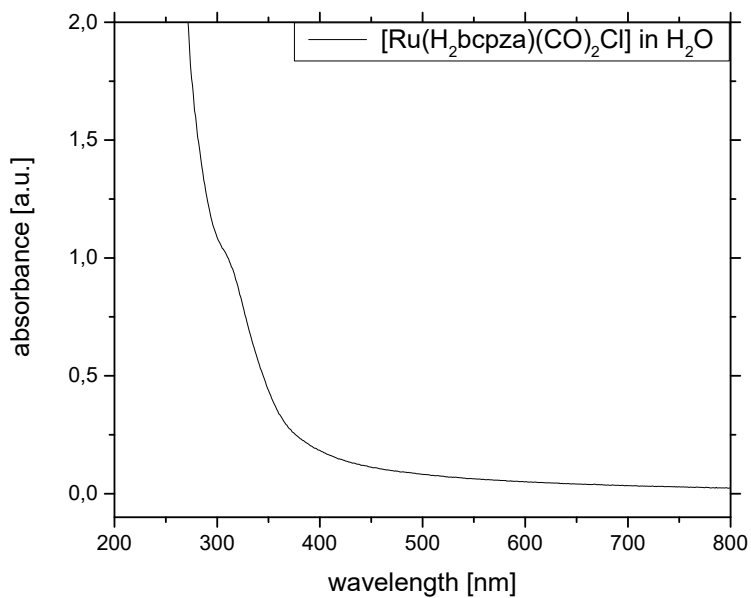

**Figure S31.** UV-vis spectrum of a saturated solution of  $[\text{Ru}(\text{H}_2\text{bcpza})\text{Cl}(\text{CO})_2]$  (**6b**) in  $\text{H}_2\text{O}$ . Concentration according to Beer-Lambert law was calculated to 1.03 mmol.

#### 4. IR spectra

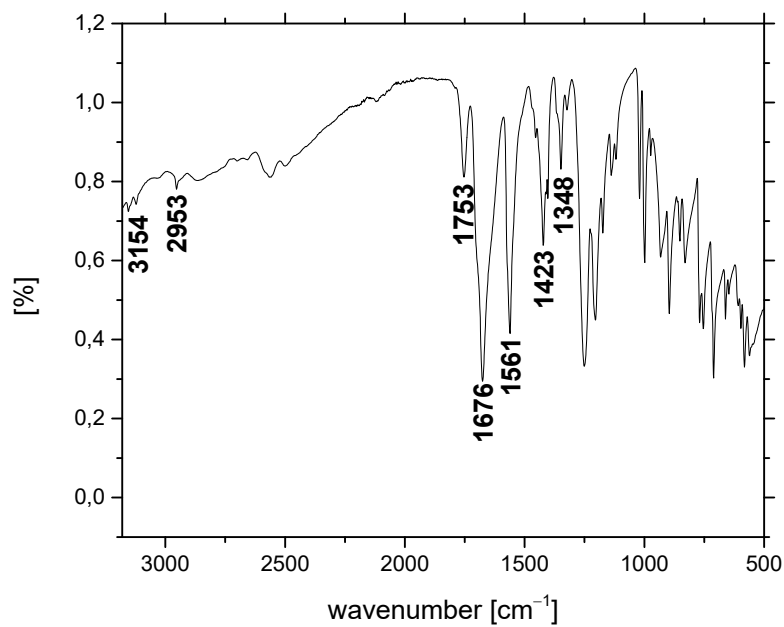

Figure S32. IR(ATR) spectrum of H<sub>3</sub>bcpza (2).

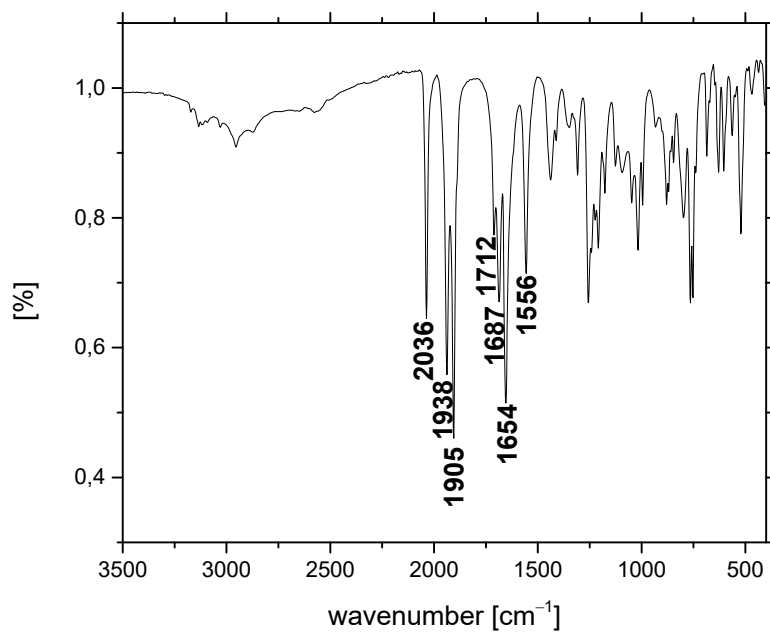

Figure S33. IR (ATR) spectrum of [Mn(H<sub>2</sub>bcpza)(CO)<sub>3</sub>] (4).

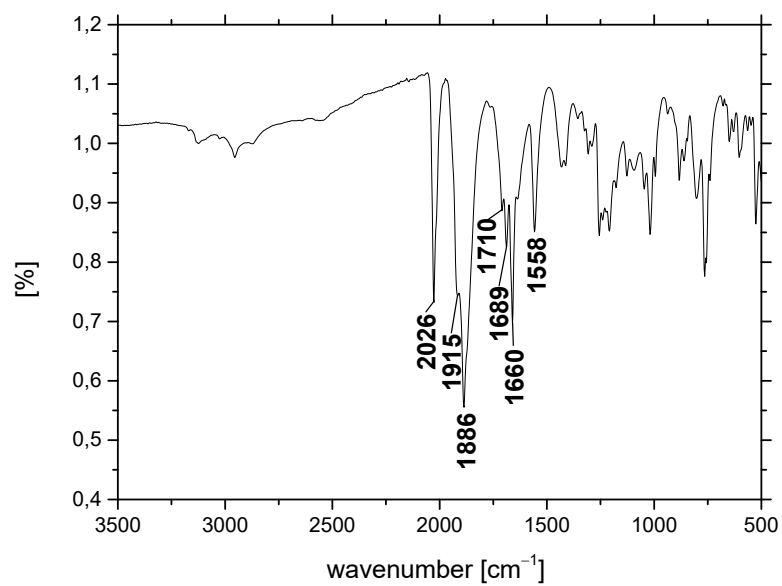

**Figure S34.** IR (ATR) spectrum of  $[\text{Re}(\text{H}_2\text{bcpza})(\text{CO})_3]$  (**5**).

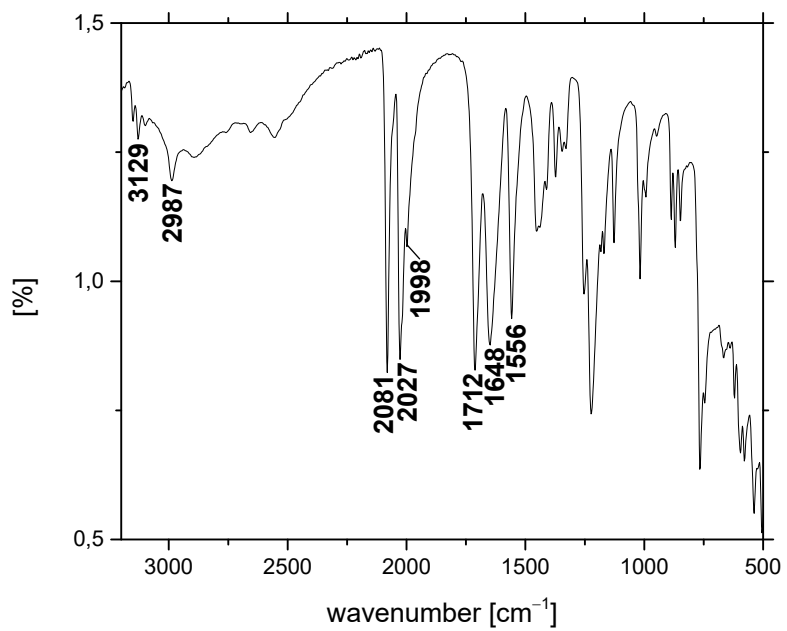

**Figure S35.** IR spectrum of crystals grown from crude aqueous phase of **6a/6b** after washing process.



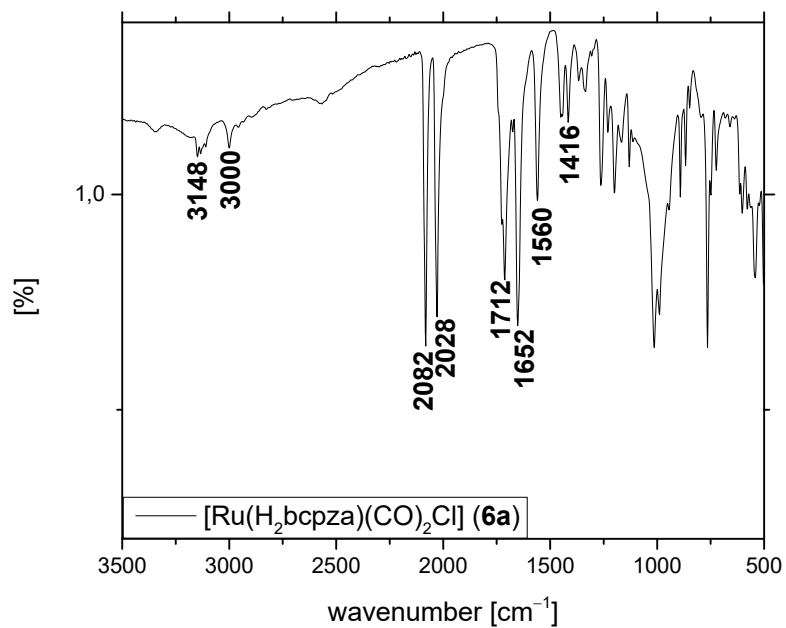

Figure S36. IR(ATR) spectrum of [Ru(H<sub>2</sub>bcpza)Cl(CO)<sub>2</sub>] (6a).

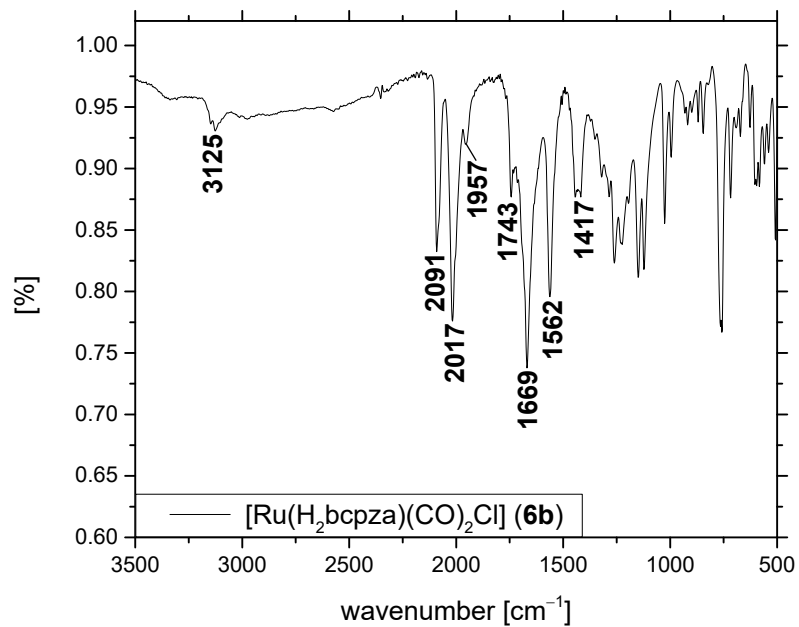

Figure S37. IR(ATR) spectrum of [Ru(H<sub>2</sub>bcpza)Cl(CO)<sub>2</sub>] (6b).

## 5. MS data

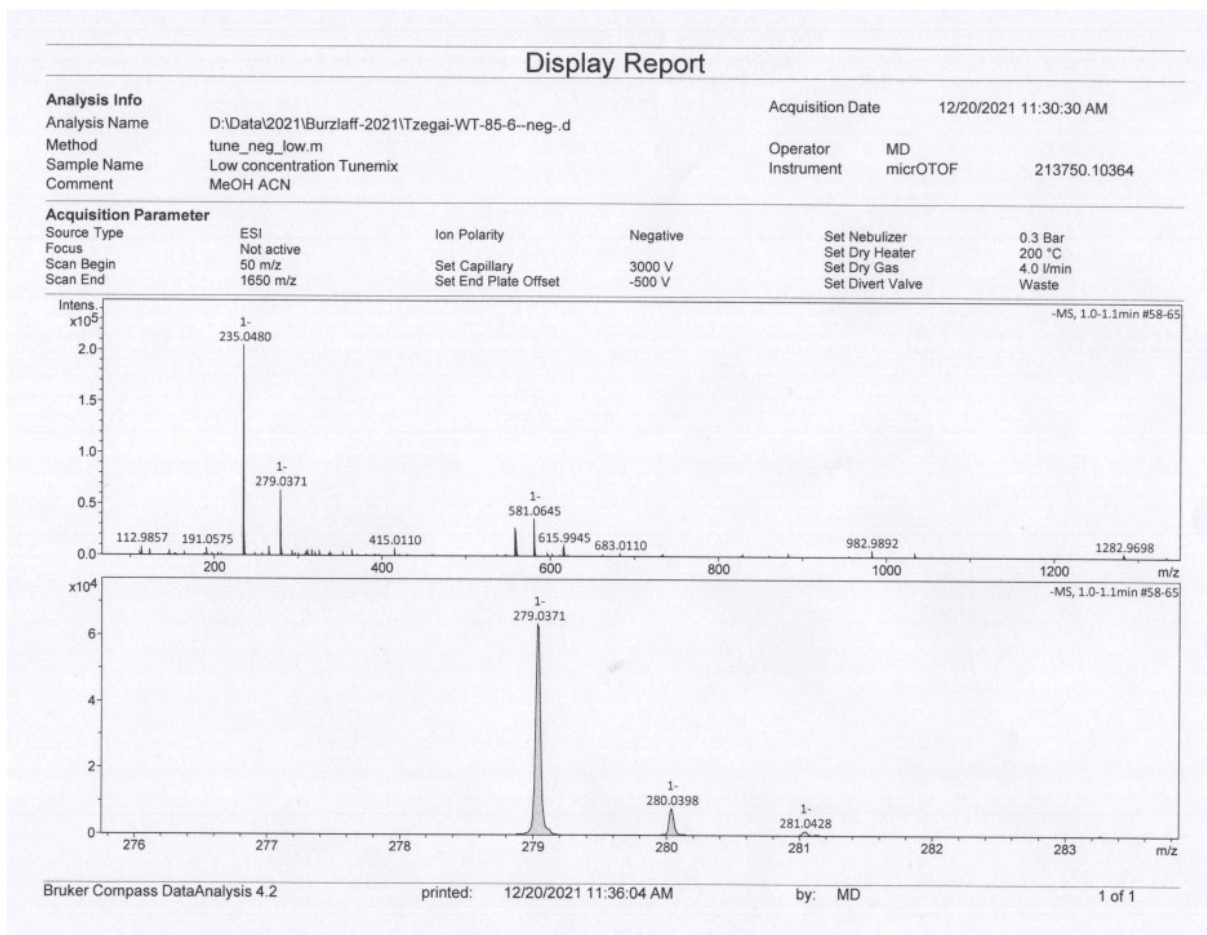

**Figure S38.** ESI-MS (negative ion mode) of H<sub>3</sub>bcpza (**2**) in methanol+acetonitrile.

## Display Report

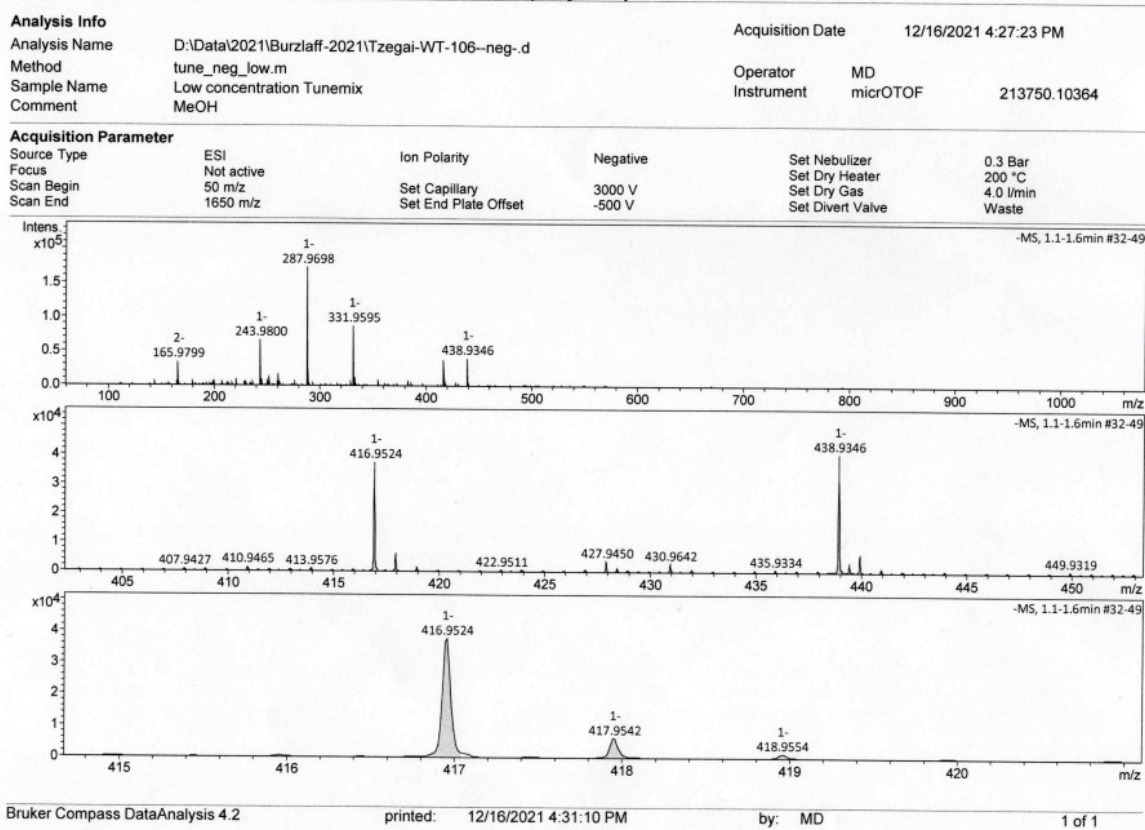

**Figure S39** ESI-MS (negative ion mode) spectrum of  $[\text{Mn}(\text{H}_2\text{bcpza})(\text{CO})_3]$  (**4**) in methanol.

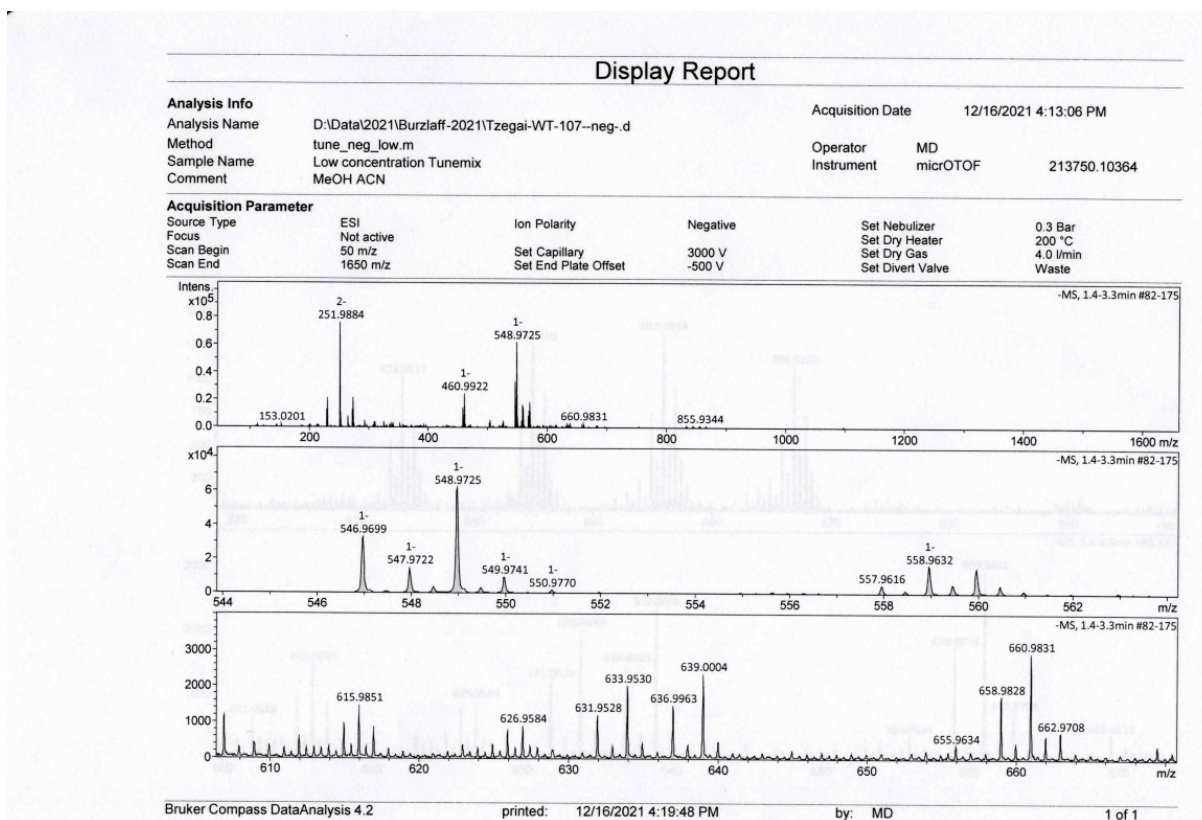

**Figure S40.** ESI-MS (negative ion mode) of  $[\text{Re}(\text{H}_2\text{bcpza})(\text{CO})_3]$  (**5**) recorded in methanol/acetonitrile.

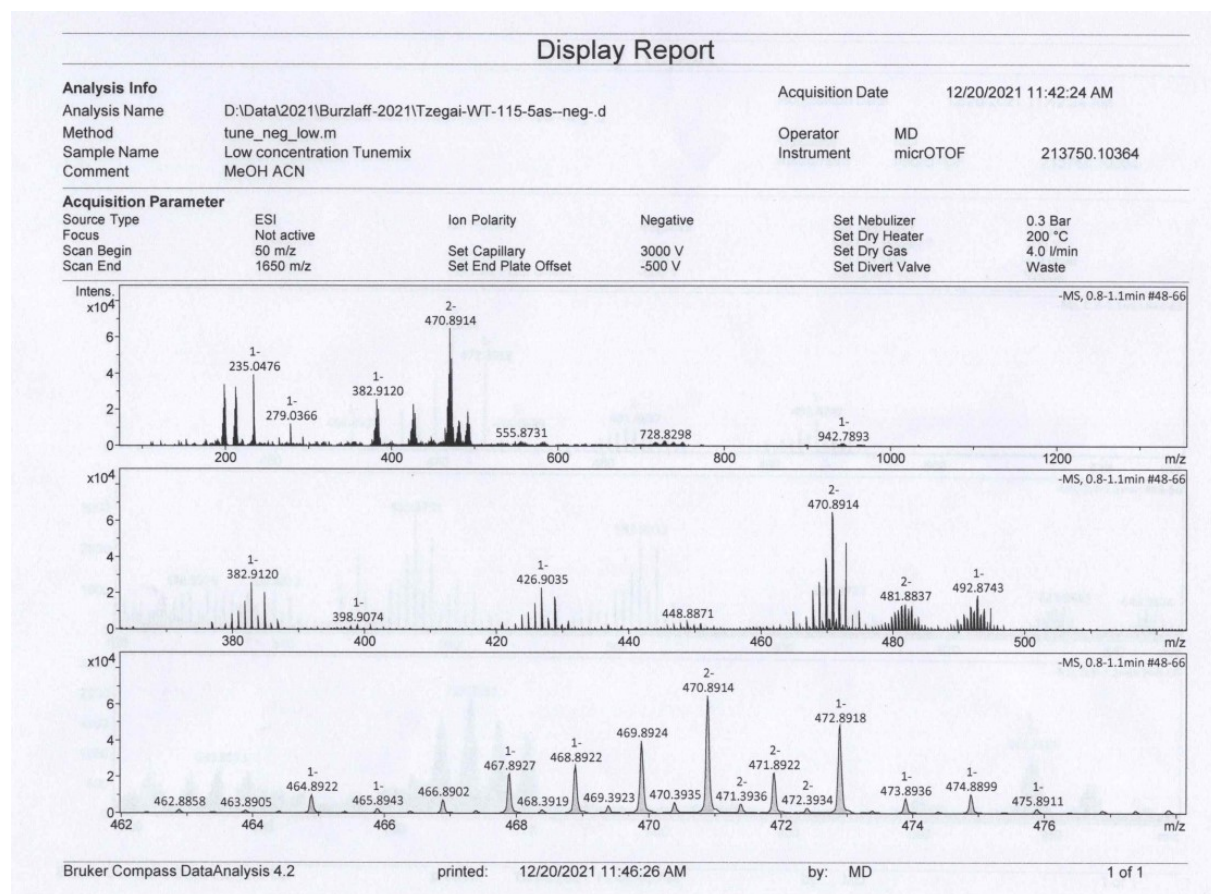

**Figure S41.** ESI-MS (negative ion mode) of  $[\text{Ru}(\text{H}_2\text{bcpza})\text{Cl}(\text{CO})_2]$  (**6b**) recorded in methanol+acetonitrile.

## 6. Elemental analyses

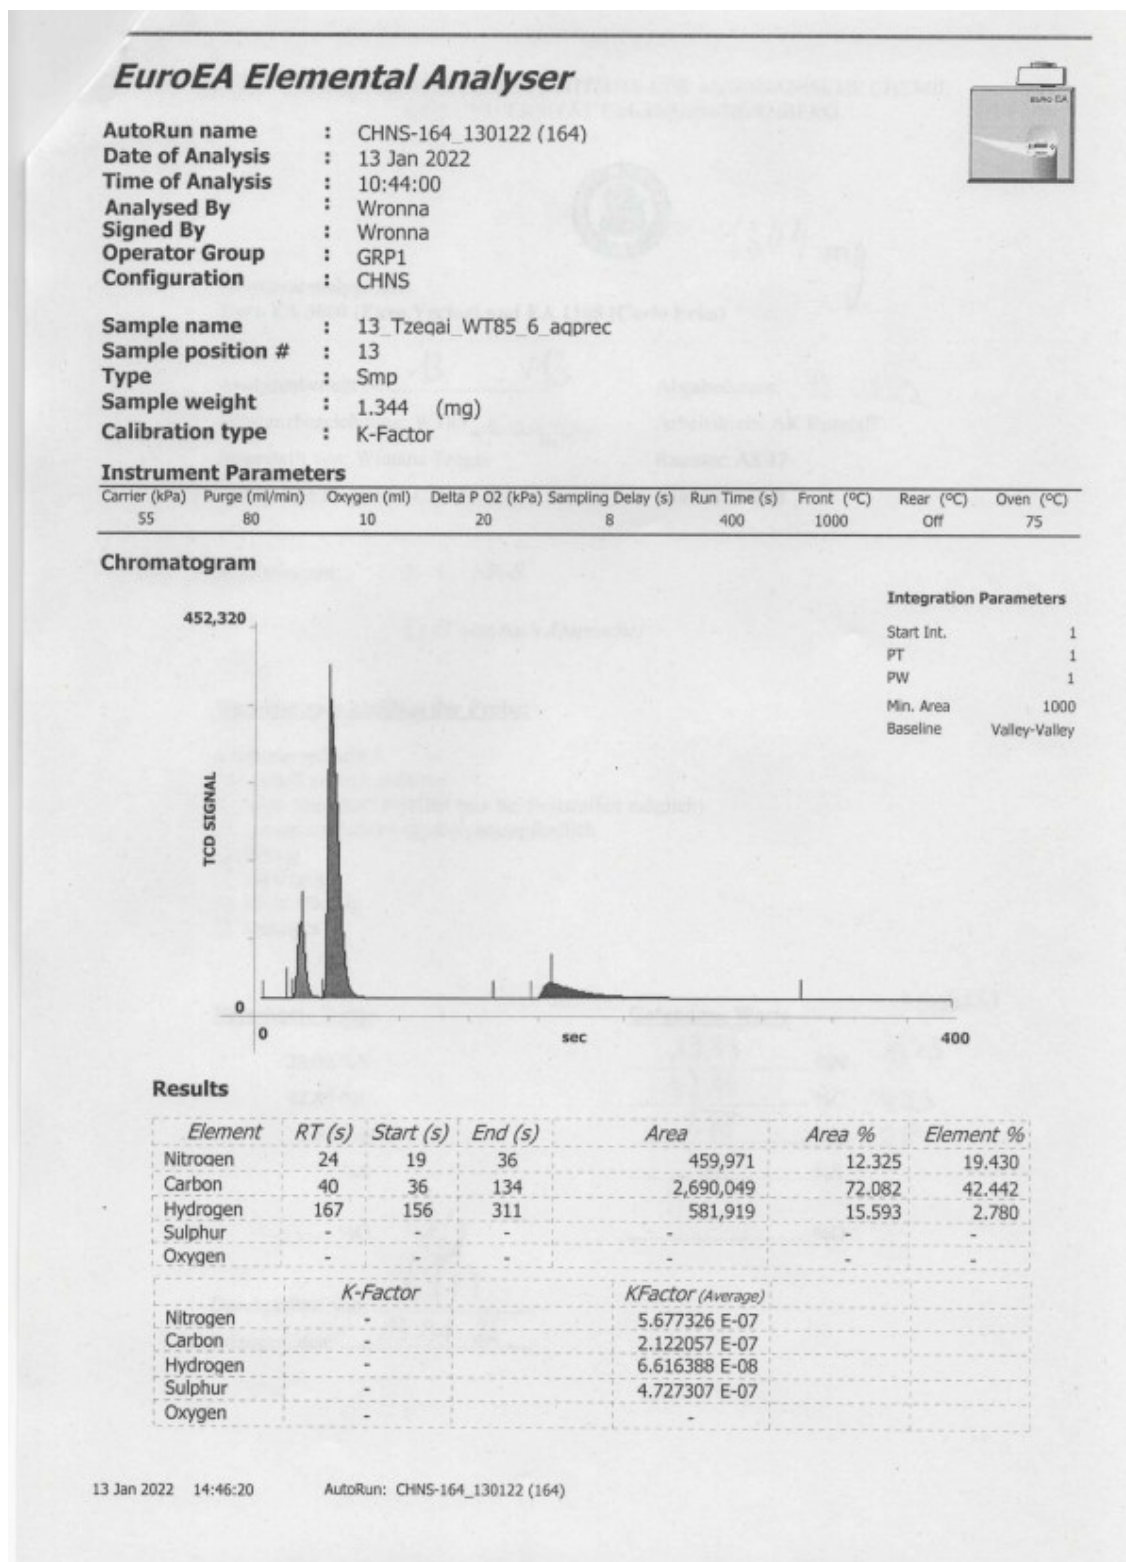Figure S42. Elemental analysis of H<sub>3</sub>bcpza (2).

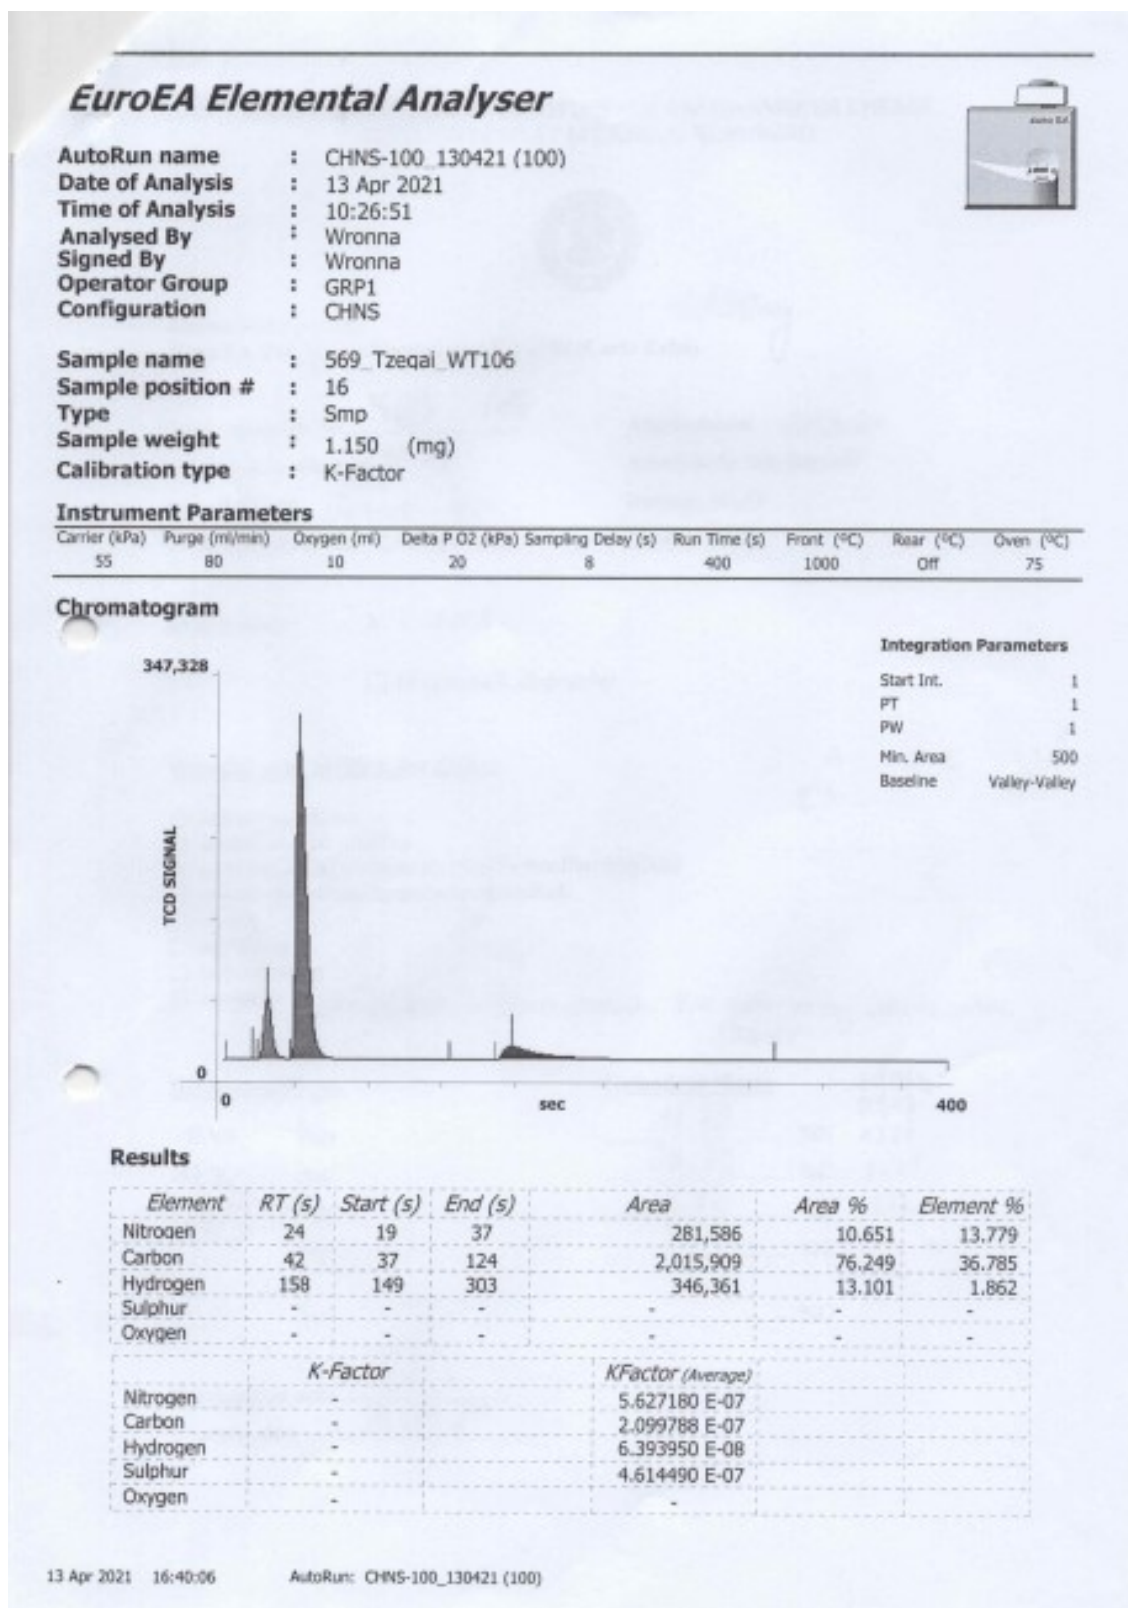

Figure S43. Elemental analysis of  $[\text{Mn}(\text{H}_2\text{bcpza})(\text{CO})_3]$  (**4**).

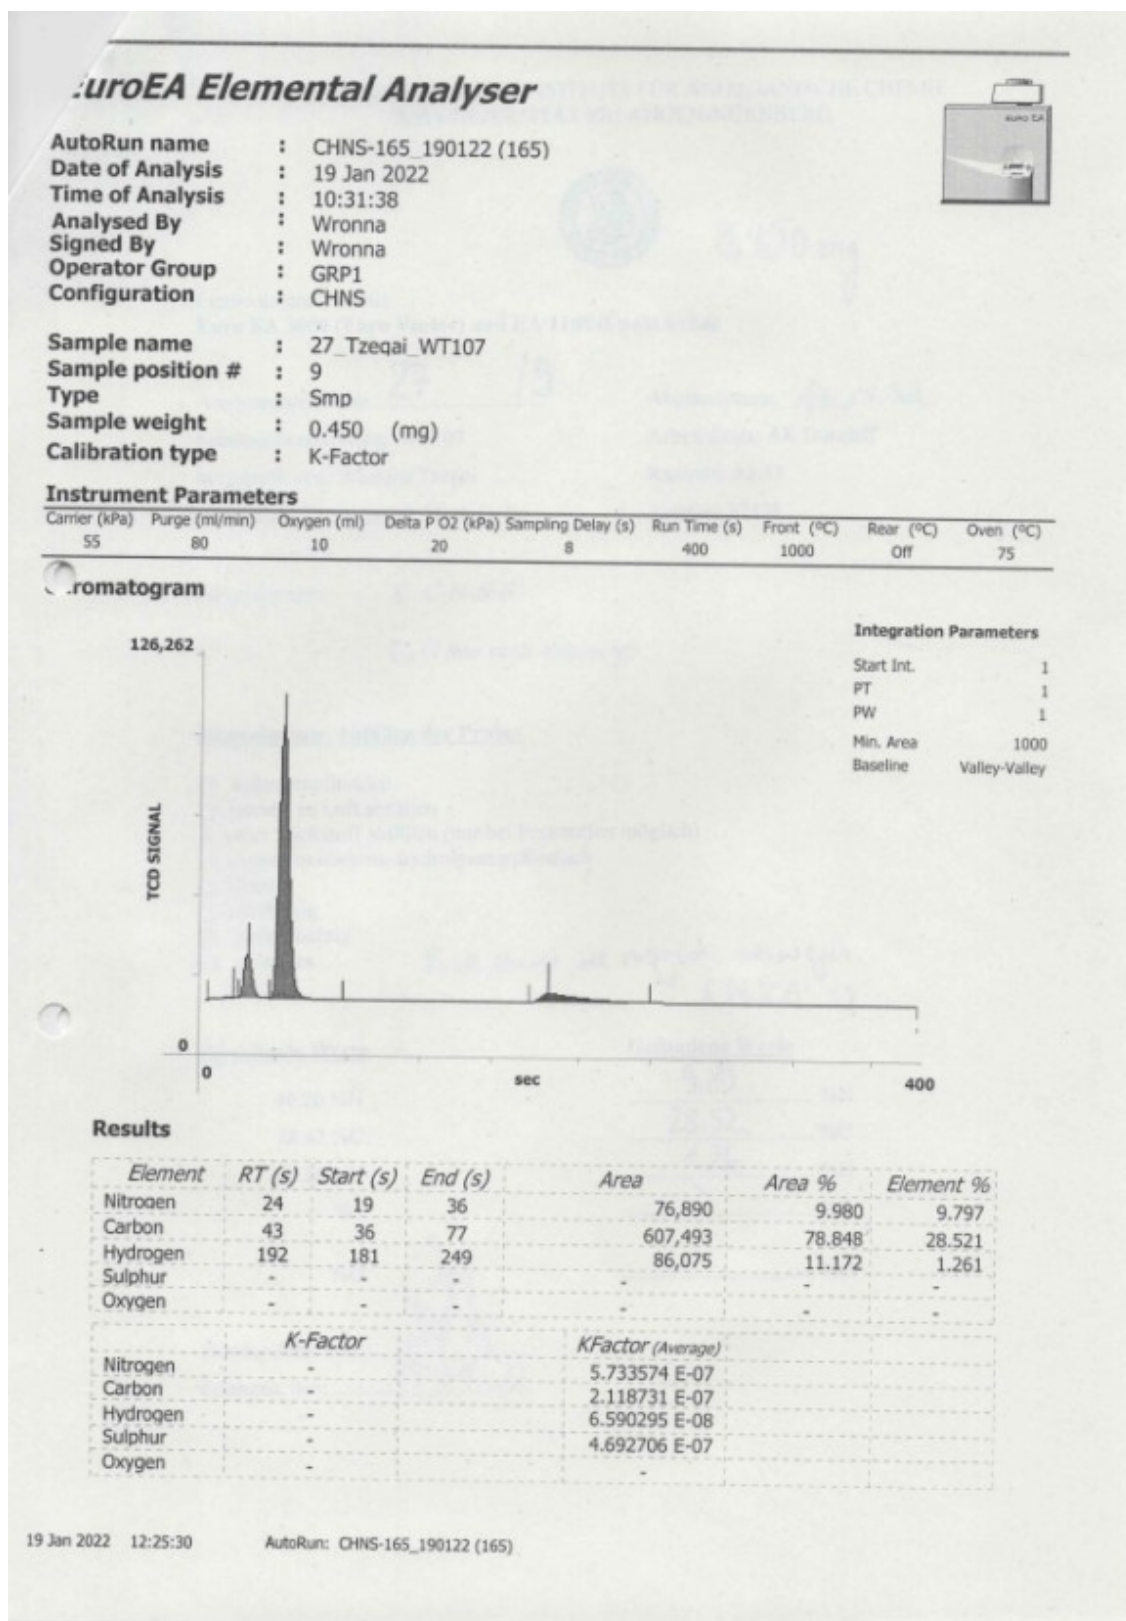

Figure S44. Elemental analysis of  $[\text{Re}(\text{H}_2\text{bcpza})(\text{CO})_3]$  (**5**).



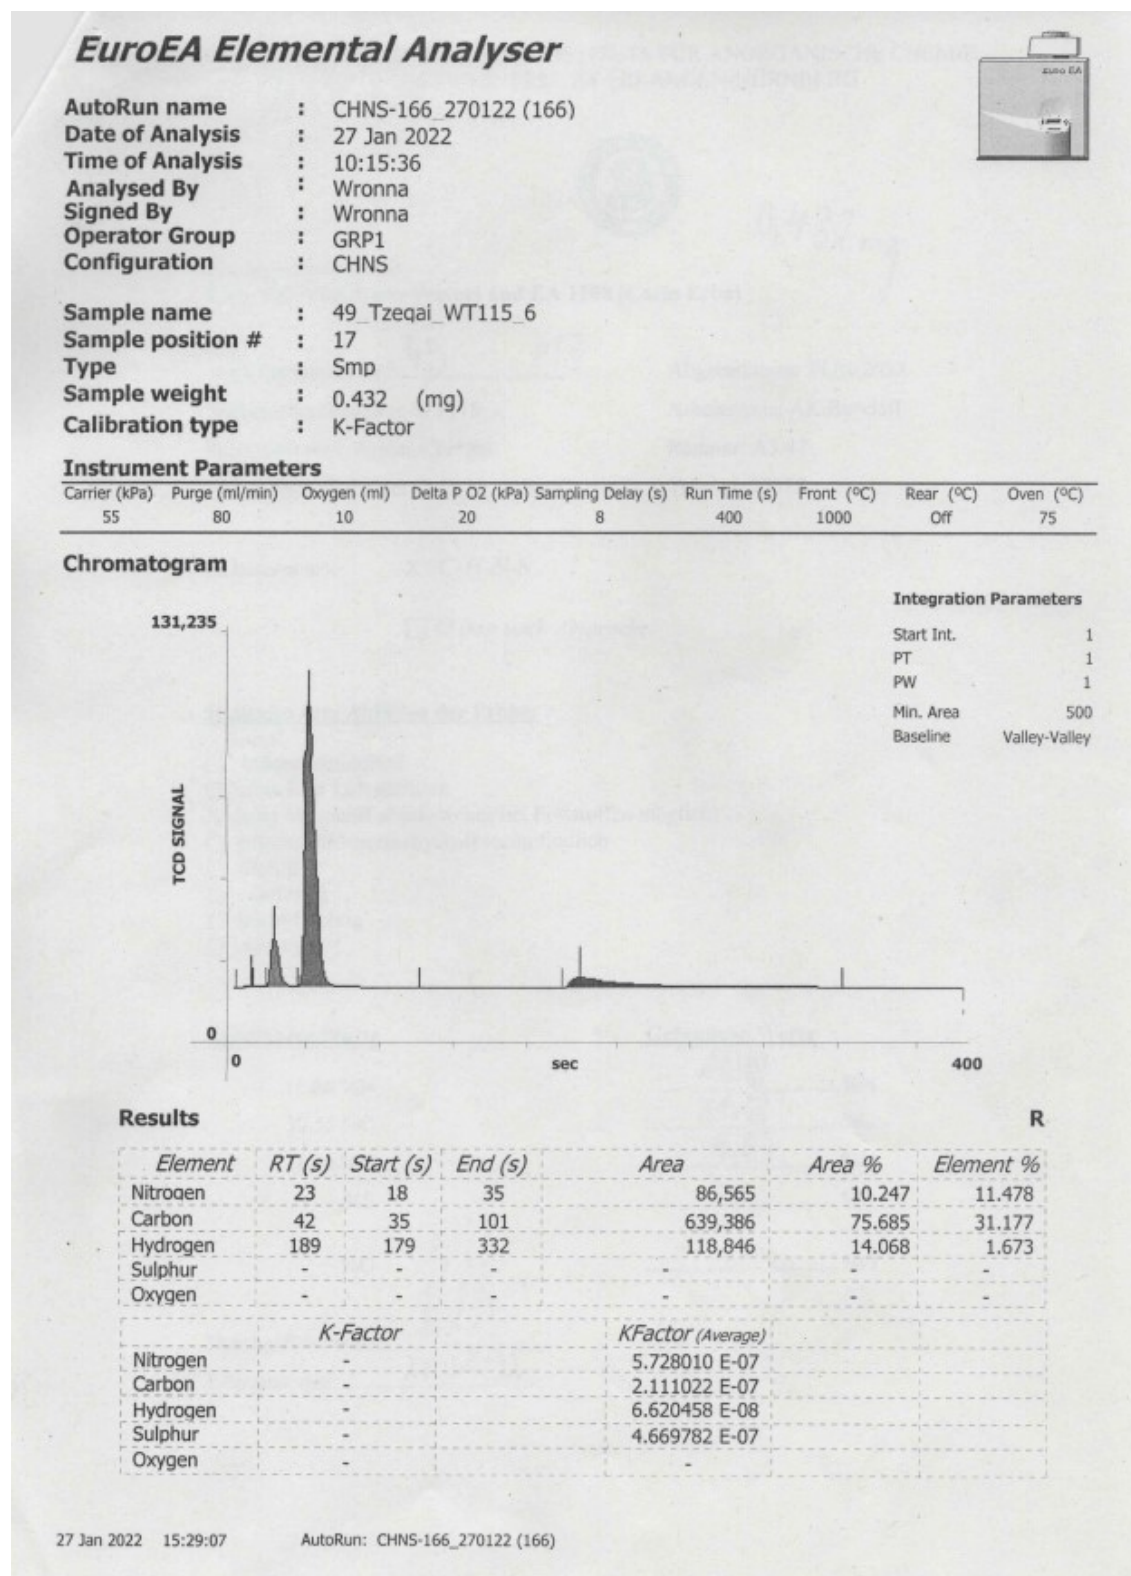

Figure S45. Elemental analysis of  $[\text{Ru}(\text{H}_2\text{bcpza})\text{Cl}(\text{CO})_2]$  (**6a**).

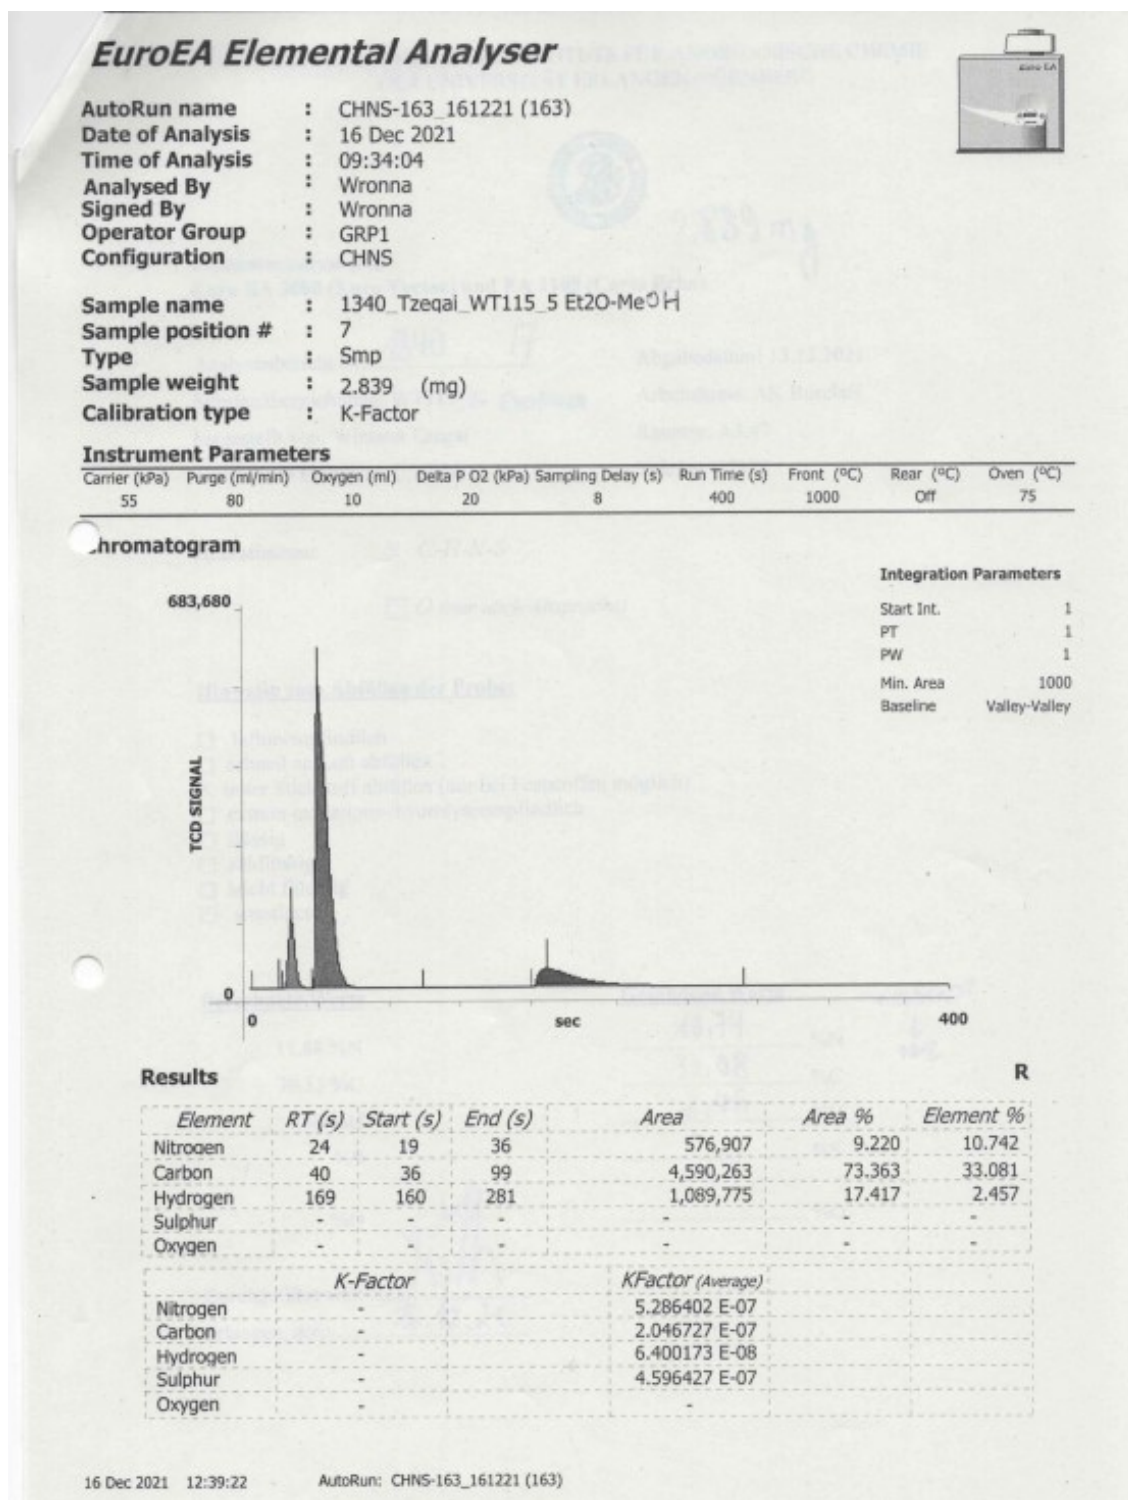

Figure S46. Elemental analysis of  $[\text{Ru}(\text{H}_2\text{bcpza})\text{Cl}(\text{CO})_2]$  (**6b**).
